# Supplementary material for: Meta-Prediction of MTHFR Gene Polymorphisms and Air Pollution on the Risk of Hypertensive Disorders in Pregnancy Worldwide
Source: PubMed Central journal article supplement (PMC5858395; doi:10.3390/ijerph15020326), 2018-02-13
Supplement: ijerph-15-00326-s001.pdf [file ijerph-15-00326-s001.pdf]

Table S1. Characteristics of studies for *MTHFR* 677 and 1298 loci distributions (70 papers).

| First Author<br>(Reference<br>number) | Year | Ethnicity-<br>Country   | MTHFR 677          |               |              |              |                             |               |               |               |     | MTHFR 1298   |              |             |                 | Quality<br>Score |              |    |                 |
|---------------------------------------|------|-------------------------|--------------------|---------------|--------------|--------------|-----------------------------|---------------|---------------|---------------|-----|--------------|--------------|-------------|-----------------|------------------|--------------|----|-----------------|
|                                       |      |                         | Cases, Type, n (%) |               |              |              | Controls, source (s), n (%) |               |               |               |     | Cases, n (%) |              |             | Controls, n (%) |                  |              |    |                 |
|                                       |      |                         | Type               | CC            | CT           | TT           | S                           | CC            | CT            | TT            | HWE | AA           | AC           | CC          | AA              |                  | AC           | CC | HWE             |
| <b>Australia</b>                      |      |                         |                    |               |              |              |                             |               |               |               |     |              |              |             |                 |                  |              |    |                 |
| Kaiser<br>(16)                        | 2001 | Caucasian-<br>Australia | 1                  | 71<br>(45.5)  | 66<br>(42.3) | 19<br>(12.2) | 1                           | 37<br>(46.8)  | 31<br>(39.2)  | 11<br>(13.9)  | Yes | NA           |              |             |                 | 18<br>(5, 9, 4)  |              |    |                 |
| Kaiser<br>(17)                        | 2000 | Caucasian-<br>Australia | 1                  | 65<br>(44.2)  | 68<br>(46.3) | 14<br>(9.5)  | 1                           | 46<br>(42.2)  | 49<br>(45.0)  | 14<br>(12.8)  | Yes | 53<br>(36.0) | 81<br>(55.2) | 13<br>(8.8) | 44<br>(40.4)    | 53<br>(48.6)     | 12<br>(11.0) | No | 20<br>(5, 9, 6) |
| <b>Europe</b>                         |      |                         |                    |               |              |              |                             |               |               |               |     |              |              |             |                 |                  |              |    |                 |
| Hiltunen<br>(18)                      | 2009 | Caucasian-<br>Finland   | 1                  | 150<br>(42.7) | 84<br>(45.7) | 14<br>(11.6) | 1                           | 380<br>(56.3) | 263<br>(39.0) | 32<br>(04.7)  | Yes | NA           |              |             |                 | 26<br>(8, 12, 6) |              |    |                 |
| Jääskeläinen<br>(19)                  | 2006 | Caucasian-<br>Finland   | 1                  | 78<br>(55.1)  | 43<br>(36.2) | 12<br>(8.7)  | 1                           | 64<br>(70.1)  | 42<br>(25.4)  | 6<br>(4.5)    | Yes | NA           |              |             |                 | 23<br>(7, 10, 6) |              |    |                 |
| Laivuori<br>(20)                      | 2000 | Caucasian-<br>Finland   | 1                  | 64<br>(46.3)  | 45<br>(43.3) | 4<br>(10.4)  | 1                           | 56<br>(47.3)  | 40<br>(43.3)  | 7<br>(9.4)    | Yes | NA           |              |             |                 | 23<br>(6, 10, 7) |              |    |                 |
| Mislanova<br>(21)                     | 2011 | Caucasian-<br>Slovak    | 1                  | 12<br>(42.8)  | 11<br>(39.3) | 5<br>(17.8)  | 1                           | 21<br>(52.5)  | 17<br>(42.5)  | 2<br>(5.0)    | Yes | NA           |              |             |                 | 22<br>(6, 10, 6) |              |    |                 |
| Nagy<br>(22)                          | 2007 | Caucasian-<br>Hungary   | 1, 4               | 71<br>(43.3)  | 68<br>(41.5) | 25<br>(15.2) | 1                           | 32<br>(43.8)  | 35<br>(47.9)  | 6<br>(8.2)    | Yes | NA           |              |             |                 | 24<br>(7, 11, 6) |              |    |                 |
|                                       |      |                         | 1                  | 49<br>(48.5)  | 43<br>(42.5) | 9<br>(8.9)   | NA                          |               |               |               |     |              |              |             |                 |                  |              |    |                 |
|                                       |      |                         | 4                  | 22<br>(34.9)  | 25<br>(39.6) | 16<br>(25.4) | NA                          |               |               |               |     |              |              |             |                 |                  |              |    |                 |
| Rigó, Jr.<br>(23)                     | 2000 | Caucasian-<br>Hungary   | 1                  | 46<br>(38.3)  | 66<br>(55)   | 8<br>(6.7)   | 1                           | 42<br>(41.6)  | 53<br>(52.5)  | 6<br>(5.9)    | No  | NA           |              |             |                 | 18<br>(6, 7, 5)  |              |    |                 |
| Procházka<br>(24)                     | 2003 | Caucasian-<br>Czech     | 1                  | 24<br>(63.1)  | 12<br>(31.6) | 2<br>(5.3)   | 1                           | 40<br>(80)    | 10<br>(20)    | 0<br>(0)      | Yes | NA           |              |             |                 | 21<br>(5, 10, 6) |              |    |                 |
| Stonek<br>(25)                        | 2007 | Caucasian-<br>Austria   | 1                  | 9<br>(36.0)   | 14<br>(56.0) | 2<br>(8.0)   | 1                           | 669<br>(48.0) | 573<br>(41.0) | 155<br>(11.0) | Yes | NA           |              |             |                 | 24<br>(7, 10, 7) |              |    |                 |
| Grandone<br>(26)                      | 1997 | Caucasian-<br>Italy     | 1                  | 25<br>(26.6)  | 41<br>(43.6) | 28<br>(29.8) | 1                           | 41<br>(31.8)  | 64<br>(49.6)  | 24<br>(18.6)  | Yes | NA           |              |             |                 | 22<br>(6, 10, 6) |              |    |                 |
| Muetze<br>(27)                        | 2008 | Caucasian-<br>Germany   | 4                  | 30<br>(42.3)  | 34<br>(47.9) | 7<br>(9.9)   | 1                           | 35<br>(44.3)  | 29<br>(36.7)  | 15<br>(19.0)  | Yes | NA           |              |             |                 | 21<br>(6, 9, 6)  |              |    |                 |

| First Author<br>(Reference<br>number) | Year | Ethnicity-<br>Country     | MTHFR 677          |               |               |              |                             |               |               |              |     | MTHFR 1298   |              |              |                 |               |             |                  | Quality<br>Score |
|---------------------------------------|------|---------------------------|--------------------|---------------|---------------|--------------|-----------------------------|---------------|---------------|--------------|-----|--------------|--------------|--------------|-----------------|---------------|-------------|------------------|------------------|
|                                       |      |                           | Cases, Type, n (%) |               |               |              | Controls, source (s), n (%) |               |               |              |     | Cases, n (%) |              |              | Controls, n (%) |               |             |                  |                  |
|                                       |      |                           | Type               | CC            | CT            | TT           | S                           | CC            | CT            | TT           | HWE | AA           | AC           | CC           | AA              | AC            | CC          | HWE              |                  |
| Europe                                |      |                           |                    |               |               |              |                             |               |               |              |     |              |              |              |                 |               |             |                  |                  |
| Prasmusinto<br>(28)                   | 2002 | Caucasian -<br>Germany    | 1                  | 7<br>(46.7)   | 7<br>(46.7)   | 1<br>(6.7)   | 1                           | 12<br>(35.3)  | 15<br>(44.1)  | 7<br>(20.6)  | Yes | NA           |              |              |                 |               |             | 24<br>(6, 11, 7) |                  |
|                                       |      | Caucasian -<br>Croatia    | 1                  | 11<br>(44.0)  | 12<br>(48.0)  | 2<br>(7.6)   | 1                           | 18<br>(47.3)  | 15<br>(39.5)  | 5<br>(13.2)  | Yes |              |              |              |                 |               |             |                  |                  |
|                                       |      | South Asia -<br>Indonesia | 1                  | 34<br>(83.0)  | 6<br>(14.6)   | 1<br>(2.4)   | 1                           | 22<br>(81.5)  | 5<br>(18.5)   | 0<br>(0.0)   | Yes |              |              |              |                 |               |             |                  |                  |
| Lykke<br>(29)                         | 2012 | Caucasian -<br>Denmark    | 1, 4               | 113<br>(43.1) | 118<br>(45.0) | 31<br>(11.8) | 1                           | 906<br>(49.2) | 793<br>(43.1) | 143<br>(7.8) | Yes | NA           |              |              |                 |               |             | 24<br>(7, 10, 7) |                  |
| Demaat<br>(30)                        | 2004 | Caucasian -<br>Netherland | 1                  | 78<br>(46.8)  | 59<br>(37.6)  | 20<br>(12.7) | 1                           | 63<br>(40.1)  | 75<br>(47.8)  | 19<br>(12.1) | Yes | NA           |              |              |                 |               |             | 22<br>(5, 11, 6) |                  |
| Lachmeijer<br>(31)                    | 2001 | Caucasian -<br>Netherland | 1, 4               | 22<br>(37.9)  | 21<br>(44.7)  | 4<br>(8.5)   | 1                           | 58<br>(48.3)  | 51<br>(42.5)  | 11<br>(9.2)  | Yes | 18<br>(38.3) | 22<br>(46.8) | 7<br>(14.9)  | 45<br>(37.5)    | 64<br>(53.3)  | 11<br>(9.2) | Yes              | 20<br>(6, 8, 6)  |
| Zusterzeel<br>(14)                    | 2000 | Caucasian -<br>Netherland | 1, 4               | 72<br>(43.0)  | 74<br>(44.0)  | 21<br>(13.0) | 1                           | 205<br>(51.0) | 162<br>(40.0) | 36<br>(9.0)  | Yes | 91<br>(52.0) | 68<br>(39.0) | 17<br>(10.0) | 179<br>(44.0)   | 186<br>(46.0) | 38<br>(9.0) | Yes              | 23<br>(7, 10, 6) |
|                                       |      |                           | 1                  | 32<br>(42.0)  | 33<br>(43.0)  | 11<br>(14.0) |                             |               | NA            |              |     |              |              |              |                 |               |             |                  |                  |
|                                       |      |                           | 4                  | 40<br>(44.0)  | 41<br>(45.0)  | 10<br>(11.0) |                             |               | NA            |              |     |              |              |              |                 |               |             |                  |                  |
| Morrison<br>(15)                      | 2002 | Caucasian -<br>Scotland   | 3                  | 284<br>(40.2) | 347<br>(49.1) | 76<br>(10.7) | 1                           | 81<br>(49.4)  | 66<br>(40.2)  | 17<br>(10.4) | Yes | NA           |              |              |                 |               |             | 20<br>(5, 9, 6)  |                  |
|                                       |      |                           | 1                  | 169<br>(41.8) | 193<br>(47.7) | 42<br>(10.4) |                             |               | NA            |              |     |              |              |              |                 |               |             |                  |                  |
|                                       |      |                           | 2                  | 115<br>(37.9) | 154<br>(50.8) | 34<br>(11.2) |                             |               | NA            |              |     |              |              |              |                 |               |             |                  |                  |
| O'Shaughnessy<br>(32)                 | 1999 | Caucasian-<br>UK          | 1                  | 138<br>(48.8) | 114<br>(40.3) | 31<br>(11.0) | 1                           | 51<br>(51.0)  | 37<br>(37.0)  | 12<br>(12.0) | Yes | NA           |              |              |                 |               |             | 20<br>(7, 7, 6)  |                  |
| Murphy<br>(33)                        | 2000 | Caucasian -<br>Ireland    | 1                  | 5<br>(45.4)   | 3<br>(27.3)   | 3<br>(27.3)  | 1                           | 214<br>(39.6) | 270<br>(50.0) | 56<br>(10.4) | No  | NA           |              |              |                 |               |             | 20<br>(3, 11, 6) |                  |
| Pertegal<br>(34)                      | 2016 | Caucasian -<br>Spain      | 1                  | 16<br>(30.2)  | 24<br>(45.3)  | 13<br>(24.5) | 1                           | 31<br>(43.1)  | 29<br>(40.3)  | 12<br>(16.7) | Yes | NA           |              |              |                 |               |             | 23<br>(6, 10, 7) |                  |
| Also-Rallo<br>(35)                    | 2005 | Caucasian-<br>Spain       | 1                  | 11<br>(25.6)  | 24<br>(55.8)  | 8<br>(18.6)  | 1                           | 38<br>(30.8)  | 57<br>(46.7)  | 27<br>(22.5) | Yes | 24<br>(54.6) | 19<br>(43.6) | 0<br>(0.0)   | 70<br>(57.3)    | 41<br>(33.6)  | 11<br>(9.1) | Yes              | 24<br>(7, 11, 6) |

| First Author<br>(Reference<br>number) | Year | Ethnicity-<br>Country | MTHFR 677          |                                        |                                        |                                        |                             |               |               |               |                 | MTHFR 1298   |    |    |                 | Quality<br>Score |    |    |     |
|---------------------------------------|------|-----------------------|--------------------|----------------------------------------|----------------------------------------|----------------------------------------|-----------------------------|---------------|---------------|---------------|-----------------|--------------|----|----|-----------------|------------------|----|----|-----|
|                                       |      |                       | Cases, Type, n (%) |                                        |                                        |                                        | Controls, source (s), n (%) |               |               |               |                 | Cases, n (%) |    |    | Controls, n (%) |                  |    |    |     |
|                                       |      |                       | Type               | CC                                     | CT                                     | TT                                     | S                           | CC            | CT            | TT            | HWE             | AA           | AC | CC | AA              |                  | AC | CC | HWE |
| <b>North America</b>                  |      |                       |                    |                                        |                                        |                                        |                             |               |               |               |                 |              |    |    |                 |                  |    |    |     |
| Powers<br>(36)                        | 2003 | Caucasian -<br>USA    | 1                  | 14<br>(51.9)                           | 0<br>(0.0)                             | 13<br>(48.1)                           | 1                           | 15<br>(50.0)  | 0<br>(0.0)    | 15<br>(50.0)  | No              | NA           |    |    |                 | 19<br>(5, 8, 6)  |    |    |     |
| Kim<br>(37)                           | 2001 | Caucasian -<br>USA    | 1, 4<br>4          | 131<br>10<br>(46.6)<br>(47.6)          | 117<br>9<br>(41.6)<br>(42.9)           | 33<br>2<br>(11.7)<br>(9.5)             | 2                           | 167<br>(46.4) | 152<br>(42.2) | 41<br>(11.4)  | Yes<br>NA       | NA           |    |    |                 | 25<br>(7, 11, 7) |    |    |     |
| Livingstone<br>(38)                   | 2001 | Caucasian -<br>USA    | 1                  | 66<br>(60.0)                           | 34<br>(31.0)                           | 10<br>(9.0)                            | 1                           | 61<br>(64.2)  | 27<br>(28.4)  | 7<br>(7.4)    | Yes             | NA           |    |    |                 | 23<br>(7, 9, 7)  |    |    |     |
| Powers<br>(39)                        | 1999 | Caucasian -<br>USA    | 3<br>1<br>2        | 46<br>35<br>(37.4)<br>(35.5)<br>(47.0) | 58<br>49<br>(47.2)<br>(49.5)<br>(38.3) | 19<br>15<br>(15.4)<br>(15.0)<br>(14.7) | 1                           | 54<br>(47.4)  | 46<br>(40.4)  | 14<br>(12.2)  | Yes<br>NA<br>NA | NA           |    |    |                 | 22<br>(7, 9, 6)  |    |    |     |
| <b>Hispanic</b>                       |      |                       |                    |                                        |                                        |                                        |                             |               |               |               |                 |              |    |    |                 |                  |    |    |     |
| Vazquez-Alaniz<br>(40)                | 2014 | Mestizo -<br>Mexican  | 3<br>1<br>2        | 59<br>37<br>(31.4)<br>(32.7)<br>(29.3) | 91<br>57<br>(48.4)<br>(50.5)<br>(45.4) | 38<br>19<br>(20.2)<br>(16.8)<br>(25.3) | 1                           | 54<br>(28.0)  | 97<br>(50.0)  | 43<br>(22.0)  | Yes<br>NA<br>NA | NA           |    |    |                 | 23<br>(7, 10, 6) |    |    |     |
| Coral-Vázquez<br>(41)                 | 2013 | Mestizo –<br>Mexican  | 1                  | 38<br>(16.5)                           | 109<br>(47.4)                          | 83<br>(36.1)                           | 1                           | 71<br>(20.2)  | 166<br>(47.2) | 115<br>(32.7) | Yes             | NA           |    |    |                 | 22<br>(6, 9, 7)  |    |    |     |
| Rojas<br>(42)                         | 2010 | Mestizo –<br>Mexican  | 1                  | 8<br>(28.5)                            | 9<br>(32.1)                            | 11<br>(39.2)                           | 1                           | 12<br>(29.2)  | 19<br>(46.3)  | 10<br>(24.3)  | Yes             | NA           |    |    |                 | 20<br>(4, 10, 6) |    |    |     |
| Canto<br>(43)                         | 2008 | Mestizo –<br>Mexican  | 1                  | 36<br>(28.8)                           | 66<br>(52.8)                           | 23<br>(18.4)                           | 1                           | 61<br>(22.2)  | 131<br>(47.8) | 82<br>(29.9)  | Yes             | NA           |    |    |                 | 23<br>(6, 10, 7) |    |    |     |
| Dávalos<br>(44)                       | 2005 | Mestizo –<br>Mexican  | 1                  | 13<br>(39.4)                           | 14<br>(42.4)                           | 6<br>(18.2)                            | 1                           | 24<br>(38.7)  | 27<br>(43.5)  | 11<br>(17.7)  | Yes             | NA           |    |    |                 | 21<br>(7, 9, 5)  |    |    |     |
| Pérez-Mutul<br>(45)                   | 2004 | Mestizo -<br>Mexican  | 1                  | 33<br>(22.0)                           | 66<br>(45.0)                           | 49<br>(33.0)                           | 1                           | 36<br>(20.0)  | 80<br>(45.0)  | 61<br>(35.0)  | Yes             | NA           |    |    |                 | 20<br>(6, 8, 6)  |    |    |     |
| Perales Dávila<br>(46)                | 2001 | Mestizo-<br>Mexican   | 1                  | 3<br>(23.1)                            | 5<br>(38.5)                            | 5<br>(38.5)                            | 1                           | 8<br>(53.3)   | 4<br>(26.6)   | 3<br>(20.0)   | Yes             | NA           |    |    |                 | 20<br>(4, 10, 6) |    |    |     |

| First Author<br>(Reference<br>number) | Year | Ethnicity-<br>Country | MTHFR 677          |              |              |              |                             |               |               |              |     | MTHFR 1298    |              |              |                 |              |                  |     | Quality<br>Score |
|---------------------------------------|------|-----------------------|--------------------|--------------|--------------|--------------|-----------------------------|---------------|---------------|--------------|-----|---------------|--------------|--------------|-----------------|--------------|------------------|-----|------------------|
|                                       |      |                       | Cases, Type, n (%) |              |              |              | Controls, source (s), n (%) |               |               |              |     | Cases, n (%)  |              |              | Controls, n (%) |              |                  |     |                  |
|                                       |      |                       | Type               | CC           | CT           | TT           | S                           | CC            | CT            | TT           | HWE | AA            | AC           | CC           | AA              | AC           | CC               | HWE |                  |
| South American                        |      |                       |                    |              |              |              |                             |               |               |              |     |               |              |              |                 |              |                  |     |                  |
| Dusse<br>(47)                         | 2007 | Mixed-<br>Brazil      | 1                  | 16<br>(53.3) | 12<br>(40.0) | 2<br>(6.7)   | 1                           | 46<br>(53.5)  | 31<br>(37.3)  | 6<br>(7.2)   | Yes | NA            |              |              |                 |              | 20<br>(6, 10, 4) |     |                  |
| Dalmáz<br>(48)                        | 2006 | Mixed-<br>Brazil      | 1                  | 31<br>(41.3) | 27<br>(36.0) | 17<br>(22.7) | 1                           | 76<br>(52.4)  | 51<br>(35.2)  | 18<br>(12.4) | Yes | NA            |              |              |                 |              | 20<br>(6, 8, 6)  |     |                  |
| Chedraui<br>(49)                      | 2014 | Mixed -<br>Ecuador    | 1                  | 59<br>(39.3) | 73<br>(48.7) | 18<br>(12.0) | 1                           | 47<br>(31.3)  | 91<br>(60.7)  | 12<br>(8.0)  | No  | 100<br>(66.7) | 27<br>(18.0) | 23<br>(15.3) | 110<br>(73.3)   | 39<br>(26.0) | 1<br>(0.7)       | Yes | 20<br>(6, 9, 5)  |
| Williams<br>(50)                      | 2004 | Mixed-<br>Peru        | 1                  | 37<br>(29.6) | 61<br>(48.8) | 25<br>(20.0) | 1                           | 62<br>(34.6)  | 85<br>(47.5)  | 30<br>(16.8) | Yes | NA            |              |              |                 |              | 24<br>(6, 11, 7) |     |                  |
| East Asia                             |      |                       |                    |              |              |              |                             |               |               |              |     |               |              |              |                 |              |                  |     |                  |
| Yoshida<br>(51)                       | 2008 | East Asian-<br>Japan  | 1                  | 17<br>(32.7) | 17<br>(32.7) | 18<br>(34.6) | 1                           | 48<br>(42.5)  | 54<br>(47.8)  | 11<br>(9.7)  | Yes | NA            |              |              |                 |              | 20<br>(5, 9, 6)  |     |                  |
| Watanabe<br>(52)                      | 2001 | East Asian-<br>Japan  | 1                  | 40<br>(30.0) | 59<br>(44.0) | 34<br>(26.0) | 1                           | 89<br>(40.0)  | 103<br>(46.0) | 32<br>(14.0) | Yes | NA            |              |              |                 |              | 15*<br>(5, 6, 4) |     |                  |
| Kobashi<br>(53)                       | 2000 | East Asian-<br>Japan  | 3                  | 37<br>(36.6) | 52<br>(51.5) | 12<br>(11.9) | 1                           | 83<br>(38.6)  | 99<br>(46.0)  | 33<br>(15.3) | Yes | NA            |              |              |                 |              | 21<br>(6, 9, 6)  |     |                  |
|                                       |      |                       | 1                  | 25<br>(34.2) | 40<br>(54.8) | 8<br>(11.0)  | NA                          |               |               |              |     |               |              |              |                 |              |                  |     |                  |
|                                       |      |                       | 2                  | 12<br>(42.9) | 12<br>(42.9) | 4<br>(14.2)  | NA                          |               |               |              |     |               |              |              |                 |              |                  |     |                  |
| Sohda<br>(54)                         | 1997 | East Asian-<br>Japan  | 1                  | 19<br>(28.0) | 32<br>(48.0) | 16<br>(24.0) | 1                           | 38<br>(39.0)  | 49<br>(50.0)  | 11<br>(11.0) | Yes | NA            |              |              |                 |              | 16*<br>(5, 7, 4) |     |                  |
| Su<br>(55)                            | 2011 | East Asian-<br>China  | 1                  | 32<br>(59.2) | 11<br>(20.4) | 11<br>(20.4) | 1                           | 331<br>(64.5) | 154<br>(30.0) | 28<br>(5.5)  | Yes | NA            |              |              |                 |              | 22<br>(6, 10, 6) |     |                  |
| Zhong<br>(56)                         | 2010 | East Asian-<br>China  | 3                  | 33<br>(36.0) | 44<br>(46.9) | 16<br>(17.0) | 1                           | 26<br>(64.7)  | 8<br>(20.6)   | 6<br>(14.7)  | No  | NA            |              |              |                 |              | 22<br>(7, 10, 5) |     |                  |
| Shen<br>(57)                          | 2009 | East Asian-<br>China  | 3                  | 20<br>(25.0) | 42<br>(52.5) | 18<br>(22.5) | 1                           | 30<br>(50.0)  | 21<br>(35.0)  | 9<br>(15.0)  | Yes | NA            |              |              |                 |              | 21<br>(6, 10, 5) |     |                  |
|                                       |      |                       | 1                  | 12<br>(19.7) | 35<br>(57.4) | 14<br>(23.0) | NA                          |               |               |              |     |               |              |              |                 |              |                  |     |                  |
|                                       |      |                       | 2                  | 8<br>(42.1)  | 7<br>(36.8)  | 4<br>(21.1)  | NA                          |               |               |              |     |               |              |              |                 |              |                  |     |                  |

| First Author<br>(Reference<br>number) | Year | Ethnicity-<br>Country     | MTHFR 677          |               |              |              |                             |               |               |              |     | MTHFR 1298   |              |             |                 |                  |             |     | Quality<br>Score |
|---------------------------------------|------|---------------------------|--------------------|---------------|--------------|--------------|-----------------------------|---------------|---------------|--------------|-----|--------------|--------------|-------------|-----------------|------------------|-------------|-----|------------------|
|                                       |      |                           | Cases, Type, n (%) |               |              |              | Controls, source (s), n (%) |               |               |              |     | Cases, n (%) |              |             | Controls, n (%) |                  |             |     |                  |
|                                       |      |                           | Type               | CC            | CT           | TT           | S                           | CC            | CT            | TT           | HWE | AA           | AC           | CC          | AA              | AC               | CC          | HWE |                  |
| <b>East Asia</b>                      |      |                           |                    |               |              |              |                             |               |               |              |     |              |              |             |                 |                  |             |     |                  |
| Ding<br>(58)                          | 2008 | East Asian-<br>China      | 2                  | 20<br>(21.8)  | 37<br>(40.2) | 35<br>(38.0) | 1                           | 18<br>(20.2)  | 55<br>(61.8)  | 16<br>(18.0) | No  | NA           |              |             |                 | 19<br>(4, 9, 6)  |             |     |                  |
| Wang<br>(59)                          | 2008 | East Asian-<br>China      | 1                  | 6<br>(14.3)   | 19<br>(45.2) | 17<br>(40.5) | 1                           | 13<br>(20.3)  | 40<br>(62.5)  | 11<br>(17.2) | No  | NA           |              |             |                 | 21<br>(5, 11, 5) |             |     |                  |
| Zhang<br>(60)                         | 2007 | East Asian-<br>China      | 1                  | 12<br>(22.7)  | 21<br>(39.6) | 20<br>(37.7) | 1                           | 10<br>(20.4)  | 30<br>(61.2)  | 9<br>(18.4)  | Yes | NA           |              |             |                 | 22<br>(6, 10, 6) |             |     |                  |
| Wang<br>(61)                          | 2006 | East Asian-<br>China      | 3                  | 26<br>(48.1)  | 22<br>(40.7) | 6<br>(11.1)  | 1                           | 89<br>(71.2)  | 27<br>(21.6)  | 9<br>(7.2)   | No  | NA           |              |             |                 | 19<br>(3, 10, 6) |             |     |                  |
| Tian<br>(62)                          | 2005 | East Asian-<br>China      | 3                  | 34<br>(55.7)  | 20<br>(32.7) | 7<br>(11.5)  | 1                           | 40<br>(71.5)  | 12<br>(21.4)  | 4<br>(7.1)   | No  | NA           |              |             |                 | 23<br>(7, 11, 5) |             |     |                  |
|                                       |      |                           | 1                  | 22<br>(56.9)  | 12<br>(30.8) | 5<br>(12.8)  |                             |               |               |              | NA  |              |              |             |                 |                  |             |     |                  |
|                                       |      |                           | 2                  | 12<br>(54.5)  | 8<br>(36.4)  | 2<br>(9.1)   |                             |               |               |              | NA  |              |              |             |                 |                  |             |     |                  |
| Niu<br>(63)                           | 2004 | East Asian-<br>China      | 1, 4               | 6<br>(8.2)    | 45<br>(61.6) | 22<br>(30.2) | 1                           | 12<br>(16.2)  | 43<br>(58.1)  | 19<br>(25.7) | Yes | NA           |              |             |                 | 20<br>(5, 10, 5) |             |     |                  |
| Wang<br>(64)                          | 2004 | East Asian-<br>China      | 3                  | 53<br>(53.5)  | 31<br>(31.3) | 15<br>(15.2) | 1                           | 25<br>(46.3)  | 24<br>(44.4)  | 5<br>(9.3)   | Yes | NA           |              |             |                 | 20<br>(5, 9, 6)  |             |     |                  |
| Fu<br>(65)                            | 2003 | East Asian-<br>China      | 2                  | 24<br>(23.5)  | 53<br>(52.0) | 25<br>(24.5) | 1                           | 46<br>(46.0)  | 40<br>(40.0)  | 14<br>(14.0) | Yes | NA           |              |             |                 | 18<br>(4, 10, 4) |             |     |                  |
| Wei<br>(66)                           | 2001 | East Asian-<br>China      | 2                  | 23<br>(54.7)  | 13<br>(31.0) | 6<br>(14.3)  | 1                           | 20<br>(55.6)  | 11<br>(30.5)  | 5<br>(13.9)  | Yes | NA           |              |             |                 | 22<br>(6, 11, 5) |             |     |                  |
| Li<br>(67)                            | 2000 | East Asian-<br>China      | 1                  | 9<br>(16.0)   | 30<br>(53.0) | 18<br>(31.0) | 2                           | 44<br>(37.0)  | 58<br>(49.0)  | 18<br>(15.0) | Yes | NA           |              |             |                 | 17<br>(4, 8, 5)  |             |     |                  |
| Liao<br>(68)                          | 2005 | East Asian-<br>China      | 2                  |               | NA           |              | 1                           |               | NA            |              |     | 31<br>(57.4) | 20<br>(37.0) | 3<br>(5.6)  | 60<br>(60.0)    | 36<br>(36.0)     | 4<br>(4.0)  | Yes | 22<br>(7, 10, 5) |
| <b>South Asia</b>                     |      |                           |                    |               |              |              |                             |               |               |              |     |              |              |             |                 |                  |             |     |                  |
| Kaur<br>(69)                          | 2013 | South Asian-<br>India     | 1                  | 122<br>(84.1) | 19<br>(13.1) | 4<br>(2.8)   | 1                           | 463<br>(78.1) | 109<br>(18.4) | 21<br>(3.5)  | No  | NA           |              |             |                 | 20<br>(5, 9, 6)  |             |     |                  |
| Aggarwal<br>(70)                      | 2011 | South Asian-<br>India     | 1                  | 160<br>(80.0) | 33<br>(16.5) | 7<br>(3.5)   | 1                           | 134<br>(67.0) | 58<br>(29.0)  | 8<br>(4.0)   | Yes | NA           |              |             |                 | 24<br>(7, 10, 7) |             |     |                  |
| Dissanayake<br>(71)                   | 2012 | South Asian-<br>Sri Lanka | 1                  | 136<br>(77.7) | 36<br>(20.6) | 3<br>(1.7)   | 1                           | 142<br>(83.0) | 27<br>(15.8)  | 2<br>(1.2)   | Yes | 71<br>(41.0) | 89<br>(51.4) | 13<br>(7.5) | 76<br>(44.4)    | 83<br>(48.5)     | 12<br>(7.0) | Yes | 22<br>(6, 10, 6) |

| First Author<br>(Reference<br>number) | Year | Ethnicity-<br>Country    | MTHFR 677          |               |              |              |                             |               |              |              |     | MTHFR 1298    |              |             |                 |              |            |                  |                  | Quality<br>Score |
|---------------------------------------|------|--------------------------|--------------------|---------------|--------------|--------------|-----------------------------|---------------|--------------|--------------|-----|---------------|--------------|-------------|-----------------|--------------|------------|------------------|------------------|------------------|
|                                       |      |                          | Cases, type, n (%) |               |              |              | Controls, source (s), n (%) |               |              |              |     | Cases, n (%)  |              |             | Controls, n (%) |              |            |                  |                  |                  |
|                                       |      |                          | Type               | CC            | CT           | TT           | S                           | CC            | CT           | TT           | HWE | AA            | AC           | CC          | AA              | AC           | CC         | HWE              |                  |                  |
| <b>Middle Eastern</b>                 |      |                          |                    |               |              |              |                             |               |              |              |     |               |              |             |                 |              |            |                  |                  |                  |
| Salimi<br>(72)                        | 2015 | Mid-Eastern-<br>Iran     | 1                  | 124<br>(64.6) | 60<br>(31.2) | 8<br>(4.2)   | 1                           | 136<br>(69.4) | 51<br>(26.0) | 9<br>(4.6)   | Yes | 124<br>(64.6) | 58<br>(30.2) | 10<br>(5.2) | 146<br>(74.5)   | 43<br>(22.0) | 7<br>(3.5) | Yes              | 24<br>(7, 11, 6) |                  |
| Rahimi<br>(73)                        | 2013 | Mid-Eastern-<br>Iran     | 1                  | 110<br>(55.6) | 72<br>(36.4) | 16<br>(8.1)  | 1                           | 52<br>(51.5)  | 45<br>(44.6) | 4<br>(4.0)   | Yes | NA            |              |             |                 |              |            | 20<br>(7, 7, 6)  |                  |                  |
| Saravani<br>(74)                      | 2011 | Mid-Eastern-<br>Iran     | 1                  | 82<br>(77.0)  | 23<br>(22.0) | 1<br>(1.0)   | 1                           | 78<br>(73.0)  | 21<br>(19.5) | 8<br>(7.5)   | No  | NA            |              |             |                 |              |            |                  |                  |                  |
| Deveer<br>(75)                        | 2013 | Mid-Eastern-<br>Turkey   | 1                  | 29<br>(58.0)  | 16<br>(32.0) | 5<br>(10.0)  | 1                           | 26<br>(52.0)  | 18<br>(36.0) | 6<br>(12.0)  | Yes | 28<br>(36.0)  | 25<br>(50.0) | 7<br>(14.0) | 20<br>(40.0)    | 26<br>(52.0) | 4<br>(8.0) | Yes              | 19<br>(5, 9, 5)  |                  |
| Dogan<br>(76)                         | 2011 | Mid-Eastern-<br>Turkey   | 4                  | 16<br>(47.1)  | 15<br>(44.1) | 3<br>(8.8)   | 1                           | 17<br>(68.0)  | 7<br>(28.0)  | 1<br>(4.0)   | Yes | NA            |              |             |                 |              |            | 22<br>(6, 10, 6) |                  |                  |
| Demir<br>(77)                         | 2006 | Mid-Eastern-<br>Turkey   | 2                  | 31<br>(34.4)  | 49<br>(54.5) | 10<br>(11.1) | 1                           | 43<br>(42.2)  | 47<br>(46.1) | 12<br>(11.8) | Yes | NA            |              |             |                 |              |            | 20<br>(6, 8, 6)  |                  |                  |
| Yilmaz<br>(78)                        | 2004 | Caucasian-<br>Turkey     | 1                  | 29<br>(45.3)  | 28<br>(43.8) | 7<br>(10.9)  | 1                           | 24<br>(51.1)  | 17<br>(36.2) | 6<br>(12.7)  | Yes | NA            |              |             |                 |              |            | 20<br>(6, 8, 6)  |                  |                  |
| <b>Africa</b>                         |      |                          |                    |               |              |              |                             |               |              |              |     |               |              |             |                 |              |            |                  |                  |                  |
| Ibrahim<br>(79)                       | 2012 | Mid-Eastern-<br>Egypt    | 1                  | 9<br>(20.5)   | 20<br>(45.4) | 15<br>(34.1) | 1                           | 16<br>(36.4)  | 28<br>(63.6) | 0<br>(0.0)   | No  | NA            |              |             |                 |              |            | 22<br>(5, 11, 6) |                  |                  |
| Klai<br>(80)                          | 2012 | African-<br>Tunisia      | 1                  | 22<br>(40.9)  | 20<br>(54.6) | 2<br>(4.6)   | 2                           | 61<br>(61.0)  | 39<br>(39.0) | 0<br>(0.0)   | No  | 40<br>(90.9)  | 0<br>(0.0)   | 4<br>(9.1)  | 93<br>(93.0)    | 7<br>(7.0)   | 0<br>(0.0) | Yes              | 21<br>(5, 10, 6) |                  |
| Rajkovic<br>(81)                      | 2000 | African-<br>Zimbabwe     | 1                  | 142<br>(83.0) | 28<br>(16.4) | 1<br>(0.6)   | 1                           | 151<br>(82.5) | 32<br>(17.5) | 0<br>(0.0)   | Yes | NA            |              |             |                 |              |            | 23<br>(7, 10, 6) |                  |                  |
| Pergoraro<br>(82)                     | 2004 | African-<br>South Africa | 3                  | 298<br>(85.4) | 50<br>(14.3) | 1<br>(0.3)   | 1                           | 298<br>(88.0) | 38<br>(11.0) | 2<br>(1.0)   | Yes | 265<br>(75.9) | 80<br>(22.9) | 4<br>(0.2)  | 263<br>(78.0)   | 67<br>(20.0) | 8<br>(2.0) | Yes              | 22<br>(7, 9, 6)  |                  |
|                                       |      |                          | 1                  | 232<br>(86.0) | 38<br>(14.0) | 1<br>(0.0)   | NA                          |               |              |              |     | 213<br>(79.0) | 55<br>(20.0) | 3<br>(1.0)  | NA              |              |            |                  |                  |                  |
|                                       |      |                          | 2                  | 66<br>(85.0)  | 12<br>(15.0) | 0<br>(0.0)   | NA                          |               |              |              |     | 52<br>(67.0)  | 25<br>(32.0) | 1<br>(1.0)  | NA              |              |            |                  |                  |                  |
| Chikosi<br>(83)                       | 1999 | African-<br>South Africa | 1                  | 86<br>(82.9)  | 18<br>(17.1) | 1<br>(1.0)   | 1                           | 97<br>(88.2)  | 13<br>(11.8) | 0<br>(0.0)   | Yes | NA            |              |             |                 |              |            | 16<br>(6, 6, 4)  |                  |                  |

Type (Type of hypertensive disorders in pregnancy): 1 = preeclampsia, and eclampsia, 2 = gestational hypertension, 3 = mixed (include 1 & 2), and 4= hemolysis, elevated liver enzymes and low platelet count (HELLP) syndrome,

S (Sources of controls): 1 = healthy pregnancy, 2 = healthy female adults, 3= healthy general people

HWE (Hardy Weinberg Equilibrium) [updated from the original report based on our calculations using the formula available at http://www.koonec.com/k-blog/2010/06/20/hardy-weinberg-equilibrium-calculator](http://www.koonec.com/k-blog/2010/06/20/hardy-weinberg-equilibrium-calculator).

Quality score ranges: 0 - 28 (external validity, 0 – 9; Internal Validity, 0 – 12; report quality, 0 -7). NA: Not available. \*: Brief Report.

## Reference List of Studies included in the Meta-analysis

### 12 Meta-analysis Papers

1. Wang X-m, Wu H-y, Qiu X-j. Methylenetetrahydrofolate reductase (MTHFR) gene C677T polymorphism and risk of preeclampsia: an updated meta-analysis based on 51 studies. *Arch Med Res* 2013;44:159-68.
2. Xia X-p, Chang W-w, Cao Y-x. Meta-analysis of the methylenetetrahydrofolate reductase C677T polymorphism and susceptibility to pre-eclampsia. *Hypertens Res* 2012;35:1129-34.
3. Lin J, August P. Genetic thrombophilias and preeclampsia: a meta-analysis. *Obstet Gynecol* 2005;105:182-92.
4. Li X, Luo YL, Zhang QH, Mao C, Wang XW, Liu S et al. Methylenetetrahydrofolate reductase gene C677T, A1298C polymorphisms and pre-eclampsia risk: a meta-analysis. *Mol Biol Rep* 2014;41:5435-48.
5. Kosmas IP, Tatsioni A, Ioannidis JP. Association of C677T polymorphism in the methylenetetrahydrofolate reductase gene with hypertension in pregnancy and pre-eclampsia: a meta-analysis. *J Hypertens* 2004;22:1655–62.
6. Yang B, Fan S, Zhi X, Li Y, Liu Y, Wang D et al. Associations of MTHFR gene polymorphisms with hypertension and hypertension in pregnancy: a meta-analysis from 114 studies with 15411 cases and 21970 controls. *PLoS One* 2014;9:e87497.
7. Reilly R, McNulty H, Pentieva K, Strain JJ, Ward M. MTHFR 677TT genotype and disease risk: is there a modulating role for B-vitamins? *Proc Nutr Soc* 2014;73:47-56.
8. Niu W, You Y, Qi Y. Strong association of methylenetetrahydrofolate reductase gene C677T polymorphism with hypertension and hypertension-in-pregnancy in Chinese: a meta-analysis. *J Hum Hypertens* 2012;26:259-67.
9. Qian X, Lu Z, Tan M, Liu H, Lu D. A meta-analysis of association between C677T polymorphism in the methylenetetrahydrofolate reductase gene and hypertension. *Eur J Hum Genet* 2007;15:1239-45.
10. Wu X, Yang K, Tang X, Sa Y, Zhou R, Liu J et al. Folate metabolism gene polymorphisms MTHFR C677T and A1298C and risk for preeclampsia: a meta-analysis. *J Assist Reprod Genet* 2015;32:797-805.
11. Tempfer C. SC, Riener E.-K., Hefler L.A., Keck C. . Polymorphisms for risk assessment of pregnancy-associated disorders - Review of the literature and Meta-analysis. . *Geburtshilfe*

Frauenheilkd 2004;64:1080-9.

12. Refsum H, Nurk E, Smith AD, Ueland PM, Gjesdal CG, Bjelland I et al. The Hordaland Homocysteine Study: a community-based study of homocysteine, its determinants, and associations with disease. *J Nutr* 2006;136:1731s-40s.

### **1 Papers with Duplicate Use of Data on Gene Counts**

13. Prasmusinto D, Skrablin S, Fimmers R, van der Ven K. Ethnic differences in the association of factor V Leiden mutation and the C677T methylenetetrahydrofolate reductase gene polymorphism with preeclampsia. *Eur J Obstet Gynecol Reprod Biol* 2004;112:162-9.

### **70 Papers included in Meta-analysis**

#### **2 Meta-analysis Papers had individual data**

14. Zusterzeel PL, Visser W, Blom HJ, Peters WH, Heil SG, Steegers EA. Methylenetetrahydrofolate reductase polymorphisms in preeclampsia and the HELLP syndrome. *Hypertens Pregnancy* 2000;19:299-307.
15. Morrison E, Miedzybrodzka Z, Campbell D, Haites N, Wilson B, Watson M et al. Prothrombotic genotypes are not associated with pre-eclampsia and gestational hypertension: results from a large population-based study and systematic review. *Thromb Haemost* 2002;87:779-85.

#### **68 case control Papers**

16. Kaiser T, Brennecke SP, Moses EK. C677T methylenetetrahydrofolate reductase polymorphism is not a risk factor for pre-eclampsia/eclampsia among Australian women. *Hum Hered* 2001;51:20-2.
17. Kaiser T, Brennecke SP, Moses EK. Methylenetetrahydrofolate reductase polymorphisms are not a risk factor for pre-eclampsia/eclampsia in Australian women. *Gynecol Obstet Invest* 2000;50:100-2.
18. Hiltunen LM, Laivuori H, Rautanen A, Kaaja R, Kere J, Krusius T et al. Blood group AB and factor V Leiden as risk factors for pre-eclampsia: a population-based nested case-control study. *Thromb Res* 2009;124:167-73.
19. Jaaskelainen E, Keski-Nisula L, Toivonen S, Romppanen EL, Helisalml S, Punnonen K et al. MTHFR C677T polymorphism is not associated with placental abruption or preeclampsia in Finnish women. *Hypertens Pregnancy* 2006;25:73-80.
20. Laivuori H, Kaaja R, Ylikorkala O, Hiltunen T, Kontula K. 677 C-->T polymorphism of the



- methylenetetrahydrofolate reductase gene and preeclampsia. *Obstet Gynecol* 2000;96:277-80.
21. Mislanova C, Martsenyuk O, Huppertz B, Obolenskaya M. Placental markers of folate-related metabolism in preeclampsia. *Reproduction* 2011;142:467-76.
  22. Nagy B, Hupuczi P, Papp Z. High frequency of methylenetetrahydrofolate reductase 677TT genotype in Hungarian HELLP syndrome patients determined by quantitative real-time PCR. *J Hum Hypertens* 2007;21:154-8.
  23. Rigo J, Jr., Nagy B, Fintor L, Tanyi J, Beke A, Karadi I et al. Maternal and neonatal outcome of preeclamptic pregnancies: the potential roles of factor V Leiden mutation and 5,10 methylenetetrahydrofolate reductase. *Hypertens Pregnancy* 2000;19:163-72.
  24. Prochazka M, Krcova V, Kudela M, Slavik L. Factor V. Leiden, Prothrombin and Methylenetetrahydrofolate Reductase Gen Mutations in Patients with Preeclampsia. *Ceska Gynecol* 2003;68:162-6.
  25. Stonek F, Hafner E, Philipp K, Hefler LA, Bentz EK, Tempfer CB. Methylenetetrahydrofolate reductase C677T polymorphism and pregnancy complications. *Obstet Gynecol* 2007;110:363-8.
  26. Grandone E, Margaglione M, Colaizzo D, Cappucci G, Paladini D, Martinelli P et al. Factor V Leiden, C > T MTHFR polymorphism and genetic susceptibility to preeclampsia. *Thromb Haemost* 1997;77:1052-4.
  27. Muetze S, Leeners B, Ortlepp JR, Kuse S, Tag CG, Weiskirchen R et al. Maternal factor V Leiden mutation is associated with HELLP syndrome in Caucasian women. *Acta Obstet Gynecol Scand* 2008;87:635-42.
  28. Prasmusinto D, Skrablin S, Hofstaetter C, Fimmers R, van der Ven K. The methylenetetrahydrofolate reductase 677 C-->T polymorphism and preeclampsia in two populations. *Obstet Gynecol* 2002;99:1085-92.
  29. Lykke JA, Bare LA, Olsen J, Lagier R, Arellano AR, Tong C et al. Thrombophilias and adverse pregnancy outcomes: results from the Danish National Birth Cohort. *J Thromb Haemost* 2012;10:1320-5.
  30. De Maat MP, Jansen MW, Hille ET, Vos HL, Bloemenkamp KW, Buitendijk S et al. Preeclampsia and its interaction with common variants in thrombophilia genes. *J Thromb Haemost* 2004;2:1588-93.
  31. Lachmeijer AM, Arngrimsson R, Bastiaans EJ, Pals G, ten Kate LP, de Vries JI et al. Mutations in the gene for methylenetetrahydrofolate reductase, homocysteine levels, and vitamin status in women with a history of preeclampsia. *Am J Obstet Gynecol* 2001;184:394-402.

32. O'Shaughnessy KM, Fu B, Ferraro F, Lewis I, Downing S, Morris NH. Factor V Leiden and thermolabile methylenetetrahydrofolate reductase gene variants in an East Anglian preeclampsia cohort. *Hypertension* 1999;33:1338-41.
33. Murphy RP, Donoghue C, Nallen RJ, D'Mello M, Regan C, Whitehead AS et al. Prospective evaluation of the risk conferred by factor V Leiden and thermolabile methylenetetrahydrofolate reductase polymorphisms in pregnancy. *Arterioscler Thromb Vasc Biol* 2000;20:266-70.
34. Pertegal M, Fenoy FJ, Hernandez M, Mendiola J, Delgado JL, Bonacasa B et al. Fetal Val108/158Met catechol-O-methyltransferase (COMT) polymorphism and placental COMT activity are associated with the development of preeclampsia. *Fertil Steril* 2016;105:134-43.e1-3.
35. Also-Rallo E, Lopez-Quesada E, Urreizti R, Vilaseca MA, Laila JM, Balcells S et al. Polymorphisms of genes involved in homocysteine metabolism in preeclampsia and in uncomplicated pregnancies. *Eur J Obstet Gynecol Reprod Biol* 2005;120:45-52.
36. Powers RW, Dunbar MS, Gallaher MJ, Roberts JM. The 677 C-T methylenetetrahydrofolate reductase mutation does not predict increased maternal homocysteine during pregnancy. *Obstet Gynecol* 2003;101:762-6.
37. Kim YJ, Williamson RA, Murray JC, Andrews J, Pietscher JJ, Peraud PJ et al. Genetic susceptibility to preeclampsia: roles of cytosine-to-thymine substitution at nucleotide 677 of the gene for methylenetetrahydrofolate reductase, 68-base pair insertion at nucleotide 844 of the gene for cystathionine beta-synthase, and factor V Leiden mutation. *Am J Obstet Gynecol* 2001;184:1211-7.
38. Livingston JC, Barton JR, Park V, Haddad B, Phillips O, Sibai BM. Maternal and fetal inherited thrombophilias are not related to the development of severe preeclampsia. *Am J Obstet Gynecol* 2001;185:153-7.
39. Powers RW, Minich LA, Lykins DL, Ness RB, Crombleholme WR, Roberts JM. Methylenetetrahydrofolate reductase polymorphism, folate, and susceptibility to preeclampsia. *J Soc Gynecol Investig* 1999;6:74-9.
40. Vazquez-Alaniz F, Lumbreras-Marquez MI, Sandoval-Carrillo AA, Aguilar-Duran M, Mendez-Hernandez EM, Barraza-Salas M et al. Association of COMT G675A and MTHFR C677T polymorphisms with hypertensive disorders of pregnancy in Mexican mestizo population. *Pregnancy Hypertens* 2014;4:59-64.
41. Coral-Vazquez RM, Romero Arauz JF, Canizales-Quinteros S, Coronel A, Valencia Villalvazo EY, Hernandez Rivera J et al. Analysis of polymorphisms and haplotypes in genes associated with vascular

- tone, hypertension and oxidative stress in Mexican-Mestizo women with severe preeclampsia. *Clin Biochem* 2013;46:627-32.
42. Rojas JC, Luna M, Rangel-Nava H, Banos D, Collados MT. Genetic thrombophilia and markers of endothelial activation in patients with preeclampsia. *Ginecol Obstet Mex* 2010;78:401-9.
43. Canto P, Canto-Cetina T, Juarez-Velazquez R, Rosas-Vargas H, Rangel-Villalobos H, Canizales-Quinteros S et al. Methylenetetrahydrofolate reductase C677T and glutathione S-transferase P1 A313G are associated with a reduced risk of preeclampsia in Maya-Mestizo women. *Hypertens Res* 2008;31:1015-9.
44. Davalos IP, Moran MC, Martinez-Abundis E, Gonzalez-Ortiz M, Flores-Martinez SE, Machorro V et al. Methylenetetrahydrofolate reductase C677T polymorphism and Factor V Leiden variant in Mexican women with preeclampsia/eclampsia. *Blood Cells Mol Dis* 2005;35:66-9.
45. Perez-Mutul J, Gonzalez-Herrera L, Sosa-Cabrera T, Martinez-Olivares R. A mutation in the 5,10-methylenetetrahydrofolate reductase gene is not associated with preeclampsia in women of southeast Mexico. *Arch Med Res* 2004;35:231-4.
46. Perales Davila J, Martinez de Villarreal LE, Triana Saldana H, Saldivar Rodriguez D, Barrera Saldana H, Rojas Martinez A et al. [Folic acid levels, homocysteine and polymorphism of methylenetetrahydrofolate reductase enzyme (MTHFR) in patients with pre-eclampsia and eclampsia]. *Ginecol Obstet Mex* 2001;69:6-11.
47. Dusse LM, Carvalho M, Braganca WF, Paiva SG, Godoi LC, Guimaraes DA et al. Inherited thrombophilias and pre-eclampsia in Brazilian women. *Eur J Obstet Gynecol Reprod Biol* 2007;134:20-3.
48. Dalmaz CA, Santos KG, Botton MR, Tedoldi CL, Roisenberg I. Relationship between polymorphisms in thrombophilic genes and preeclampsia in a Brazilian population. *Blood Cells Mol Dis* 2006;37:107-10.
49. Chedraui P, Salazar-Pousada D, Villao A, Escobar GS, Ramirez C, Hidalgo L et al. Polymorphisms of the methylenetetrahydrofolate reductase gene (C677T and A1298C) in nulliparous women complicated with preeclampsia. *Gynecol Endocrinol* 2014;30:392-6.
50. Williams MA, Sanchez SE, Zhang C, Bazul V. Methylenetetrahydrofolate reductase 677 C-->T polymorphism and plasma folate in relation to pre-eclampsia risk among Peruvian women. *J Matern Fetal Neonatal Med* 2004;15:337-44.
51. Yoshida A, Miura K, Nakayama D, Masuzaki H. Correlation between preeclampsia and prevalence of polymorphism of angiotensinogen, methylenetetrahydrofolate reductase and factor V, prothrombin

- genes among Japanese women. *Acta Med Nagasaki* 2008;53:37-41.
52. Watanabe H, Hamada H, Yamakawa-Kobayashi K, Yoshikawa H, Arinami T. Evidence for an association of the R485K polymorphism in the coagulation factor V gene with severe preeclampsia from screening 35 polymorphisms in 27 candidate genes. *Thromb Haemost* 2001;86:1594-5.
53. Kobashi G, Yamada H, Asano T, Nagano S, Hata A, Kishi R et al. Absence of association between a common mutation in the methylenetetrahydrofolate reductase gene and preeclampsia in Japanese women. *Am J Med Genet* 2000;93:122-5.
54. Sohda S, Arinami T, Hamada H, Yamada N, Hamaguchi H, Kubo T. Methylenetetrahydrofolate reductase polymorphism and pre-eclampsia. *J Med Genet* 1997;34:525-6.
55. Nianjun S, Bing L, Jianhui F. Study on the relationship between N5, 10-methylenetetrahydrofolate reductase gene and endothelial nitric oxide synthase gene polymorphisms and preeclampsia and eclampsia in the Han nationality women of Guangdong. *Progress in Obstetrics and Gynecology* 2011;20:199-202.
56. Zhong L, Feng Z, Zhu J, Wang R, Jiang J. Research on polymorphism of homocysteic acid (Hcy) metabolic enzymes genes among patients with pregnancy hypertension. *Chin J Health Lab Tech* 2010;20:2128-30.
57. Shen X, Huang Y, Tang S, Zhang C, Chen W. The relationship between the polymorphism of MTHFR gene and preeclampsia. *J Pract Obstet Gynecol* 2009;25:236-8 [in Chinese].
58. Ding YS, Guan LX, Wang YH. Study on MTHFR gene and eNOS gene polymorphisms in pregnancy-induced hypertension in the Hans of Weifang area. *Chin J Birth Health Hered* 2008;16:12-4 [in Chinese].
59. Wang SM, Wang LG, Liu XJ, Wu A, Yu J, Shi H. Investigation on the association between MTHFR gene C677T polymorphism and pre-eclampsia. *Maternal and Child Health Care of China* 2008;23:552-4 [in Chinese].
60. Zhang Z, Zhang R, Liu A, Xu Q, Liu Z. Study on eNOS gene and MTHFR gene polymorphisms in preeclampsia. *Chin J Birth Health Hered* 2007;15:21-4 [in Chinese].
61. Wang SM, Shen R, Shi XY, Jiang T, Liu XM, Shi YL et al. The role of homocysteine metabolism related enzymes gene polymorphisms on pregnancy-induced hypertension. *Chin J Prep Genetic*. 2006;14:15-7 [in Chinese].
62. Tian G, She D, Qi Q. Genetic research between gene polymorphism of homocysteine metabolism related enzymes and pre-eclampsia. *Chin J Thromb Haemost*. 2005;11:197-9 [in Chinese].

63. Niu XM, Zhang XY. The relationship between plasma homocysteine metabolism and gestational hypertension. *Chin J Obstet Gynecol.* 2004;39:347-8 [in Chinese].
64. Wang H, Li C, Wang Z, Yang F. Relationships between polymorphisms of angiotensin-converting enzyme and methylenetetrahydrofolate reductase genes and genetic susceptibility to pregnancy induced hypertension. *Chin J Obstet Gynecol.* 2004;39:369-72 [in Chinese].
65. Fu F, Liu H, Liao DL, Xiong LN, He XJ, Zhang W et al. Investigation of the relationship between polymorphism of methylenetetrahydrofolate reductase and pregnancy induced hypertension syndrome. *Jiangxi Med J.* 2003;38:401-3 [in Chinese].
66. Wei S, Zheng J, Shi D, Zou L, Bi L. Relationship between pregnancy induced hypertension and the polymorphisms of MTHFR gene and plasma homocysteine levels. *Chin J Mod Med.* 2001;11:10-9 [in Chinese].
67. Li K, Zheng D, Xue Y, Sun Y, Chen L, Guo J et al. The common C677T polymorphism in the methylenetetrahydrofolate reductase gene is associated with neural tube defects and preeclampsia. *Chin J Med Genet.* 2000;17:76-8 [in Chinese].
68. Liao Z, Tian G, Gao M, Chen S. The relationship between polymorphism of methylenetetrahydrofolate reductase (MTHFR1298) gene and pregnancy induced hypertension syndrome. *Anat Res.* 2005;27:94-6 [in Chinese].
69. Kaur L, Puri M, Kaushik S, Sachdeva MP, Trivedi SS, Saraswathy KN. Genetic thrombophilia in pregnancy: a case-control study among North Indian women. *J Thromb Thrombolysis* 2013;35:250-6.
70. Aggarwal S, Dimri N, Tandon I, Agarwal S. Preeclampsia in North Indian women: the contribution of genetic polymorphisms. *J Obstet Gynaecol Res* 2011;37:1335-41.
71. Dissanayake VH, Sirisena ND, Weerasekera LY, Gammulla CG, Seneviratne HR, Jayasekara RW. Candidate gene study of genetic thrombophilic polymorphisms in pre-eclampsia and recurrent pregnancy loss in Sinhalese women. *J Obstet Gynaecol Res* 2012;38:1168-76.
72. Salimi S, Saravani M, Yaghmaei M, Fazlali Z, Mokhtari M, Naghavi A et al. The early-onset preeclampsia is associated with MTHFR and FVL polymorphisms. *Arch Gynecol Obstet* 2015;291:1303-12.
73. Rahimi Z, Malek-Khosravi S, Rahimi Z, Jalilvand F, Parsian A. MTHFR C677T and eNOS G894T variants in preeclamptic women: Contribution to lipid peroxidation and oxidative stress. *Clin Biochem* 2013;46:143-7.
74. Saravani M, Salimi S, Yaghmaei M, Mokhtari M, Jafari M. Association between methylene

- tetrahydrofolate reductase gene C677T polymorphism with preeclampsia in south-east of Iran. *Zahedan Journal of Research in Medical Sciences* 2011;13:39-43.
75. Deveer R, Engin-Ustun Y, Akbaba E, Halisdemir B, Cakar E, Danisman N et al. Association between pre-eclampsia and inherited thrombophilias. *Fetal Pediatr Pathol* 2013;32:213-7.
76. Dogan OO, Simsek Y, Celen S, Danisman N. Frequency of hereditary thrombophilia, anticoagulant activity, and homocysteine levels in patients with hemolysis, elevated liver functions and low thrombocyte count (HELLP) syndrome. *J Obstet Gynaecol Res* 2011;37:527-33.
77. Demir SC, Evruke C, Ozgunen T, Kadayifci O, Altintas U, Kokangul S. The relationship between pregnancy induced hypertension and congenital thrombophilia. *Saudi Med J* 2006;27:1161-6.
78. Yilmaz H, Unlucerci Y, Gurdol F, Isbilen E, Isbir T. Association of pre-eclampsia with hyperhomocysteinaemia and methylenetetrahydrofolate reductase gene C677T polymorphism in a Turkish population. *Aust N Z J Obstet Gynaecol* 2004;44:423-7.
79. Ibrahim ZM, Metawie MAE, El-Baz AM, El-Bahie MA. Methylenetetrahydrofolate C677T polymorphism and pre-eclamptic Egyptian women. *Middle East Fertil Soc J* 2012;17:105-10.
80. Klai S, Fekih-Mrissa N, El Housaini S, Kaabechi N, Nsiri B, Rachdi R et al. Association of MTHFR A1298C polymorphism (but not of MTHFR C677T) with elevated homocysteine levels and placental vasculopathies. *Blood Coagul Fibrinolysis* 2011;22:374-8.
81. Rajkovic A, Mahomed K, Rozen R, Malinow MR, King IB, Williams MA. Methylenetetrahydrofolate reductase 677 C --> T polymorphism, plasma folate, vitamin B(12) concentrations, and risk of preeclampsia among black African women from Zimbabwe. *Mol Genet Metab* 2000;69:33-9.
82. Pegoraro RJ, Chikosi A, Rom L, Roberts C, Moodley J. Methylenetetrahydrofolate reductase gene polymorphisms in black South Africans and the association with preeclampsia. *Acta Obstet Gynecol Scand* 2004;83:449-54.
83. Chikosi A, Moodley J, Pegoraro R, Lanning P, Rom L. 5, 10 methylenetetrahydrofolate reductase polymorphism in black South African women with pre-eclampsia. *Br J Obstet Gynaecol* 1999;106:1219-20.

Table S2a. Differences on risk ratio and odds ratio for *MTHFR C677T* polymorphism in hypertensive disorders in pregnancy (71 studies).

| Genotype<br>(number of<br>studies) | Case<br>N=8064<br>n (%) | Control<br>N=13232<br>n (%) | Ratio<br>Type | Test of Heterogeneity |        |                | Statistical<br>Model | Test of Association             |        |
|------------------------------------|-------------------------|-----------------------------|---------------|-----------------------|--------|----------------|----------------------|---------------------------------|--------|
|                                    |                         |                             |               | Q                     | p      | I <sup>2</sup> |                      | Relative risk Ratio<br>(95% CI) | p      |
| TT (71)                            | 1087 (13.48)            | 1410 (10.66)                | Risk          | 107.30                | .0028  | 34.8%          | Random               | 1.28 (1.15 - 1.43)              | <.0001 |
|                                    |                         |                             | Odds          | 108.06                | .0024  | 35.2%          | Random               | 1.34 (1.17 - 1.53)              | <.0001 |
| CT (71)                            | 3142 (38.96)            | 5166 (39.04)                | Risk          | 103.13                | .0049  | 33.1%          | Random               | 1.01 (0.96 - 1.06)              | .7256  |
|                                    |                         |                             | Odds          | 106.52                | .0025  | 35.2%          | Random               | 1.02 (0.93 - 1.11)              | .7059  |
| CC (71)                            | 3835 (47.56)            | 6656 (50.30)                | Risk          | 120.18                | .0002  | 41.8%          | Random               | 0.94 (0.90 - 0.98)              | .0017  |
|                                    |                         |                             | Odds          | 109.86                | .0017  | 36.3%          | Random               | 0.85 (0.78 - 0.93)              | .0004  |
| TT +CT (71)                        | 4229 (52.44)            | 6576 (49.70)                | Risk          | 106.43                | .0033  | 34.2%          | Random               | 1.07 (1.03 - 1.11)              | .0002  |
|                                    |                         |                             | Odds          | 109.86                | .0017  | 36.3%          | Random               | 1.17 (1.07 - 1.28)              | .0004  |
| CC+CT (71)                         | 6977 (86.52)            | 11822 (89.34)               | Risk          | 185.55                | <.0001 | 62.3%          | Random               | 0.98 (0.96 - 0.99)              | .0023  |
|                                    |                         |                             | Odds          | 108.06                | .0024  | 35.2%          | Random               | 0.75 (0.66 - 0.85)              | <.0001 |

Table S2b. Differences on risk ratio and odds ratio for *MTHFR A1298C* polymorphism in hypertensive disorders in pregnancy (11 studies).

| Genotype<br>(number of<br>studies) | Case<br>N=1425<br>n (%) | Control<br>N=1859<br>n (%) | Ratio<br>Type | Test of Heterogeneity |        |                | Statistical<br>Model | Test of Association             |       |
|------------------------------------|-------------------------|----------------------------|---------------|-----------------------|--------|----------------|----------------------|---------------------------------|-------|
|                                    |                         |                            |               | Q                     | p      | I <sup>2</sup> |                      | Relative risk Ratio<br>(95% CI) | p     |
| CC (11)                            | 101 ( 7.08)             | 108( 5.81)                 | Risk          | 19.83                 | .0309  | 49.6%          | Random               | 1.30 (0.82 - 2.07)              | .2586 |
|                                    |                         |                            | Odds          | 20.62                 | .0239  | 51.5%          | Random               | 1.35 (0.81 - 2.25)              | .244  |
| AC (11)                            | 489 (34.27)             | 645 (34.70)                | Risk          | 14.81                 | .1393  | 32.5%          | Fixed                | 1.01 (0.92 - 1.11)              | .8107 |
|                                    |                         |                            | Odds          | 15.04                 | .1307  | 33.5%          | Fixed                | 1.02 (0.87 - 1.19)              | .8384 |
| AA (11)                            | 835 (58.51)             | 1106 (59.49)               | Risk          | 7.97                  | .6321  | 0%             | Fixed                | 0.96 (0.91 - 1.02)              | .1671 |
|                                    |                         |                            | Odds          | 8.64                  | .5666  | 0%             | Fixed                | 0.90 (0.77 - 1.05)              | .181  |
| CC +AC (11)                        | 590 (41.35)             | 753 (40.51)                | Risk          | 9.12                  | .5206  | 0%             | Fixed                | 1.06 (0.97 - 1.15)              | .1965 |
|                                    |                         |                            | Odds          | 8.58                  | .5726  | 0%             | Fixed                | 1.11 (0.95 - 1.29)              | .2074 |
| AA+AC (11)                         | 1324 (92.78)            | 1751 (94.19)               | Risk          | 43.53                 | <.0001 | 77.0%          | Random               | 0.98 (0.94 - 1.02)              | .2826 |
|                                    |                         |                            | Odds          | 20.48                 | .025   | 51.2%          | Random               | 0.73 (0.44 - 1.20)              | .2122 |

Table S3. Pooled meta-analysis: *MTHFR A1298C* polymorphism and risk of hypertensive disorders in pregnancy (11 studies).

| Genotype<br>(number of studies      | Case<br>N=1425<br>n (%) | Control<br>N=1859<br>n (%) | Test of Heterogeneity |          |                    | Statistical<br>Model | Test of Association       |          |
|-------------------------------------|-------------------------|----------------------------|-----------------------|----------|--------------------|----------------------|---------------------------|----------|
|                                     |                         |                            | Q                     | <i>p</i> | I <sup>2</sup> (%) |                      | Relative risk<br>(95% CI) | <i>p</i> |
| CC (11)                             | 101 (7.09)              | 108 (5.81)                 | 19.81                 | .0311    | 49.5               | Random               | 1.31 (0.82 – 2.07)        | .2558    |
| Caucasian (4)                       | 37 (8.96)               | 72 (9.55)                  | 3.73                  | .2926    | 19.5               | Fixed                | 0.92 (0.62 – 1.35)        | .6603    |
| South American (1)                  | 23(15.33)               | 1 (0.67)                   | -                     | -        | -                  | -                    | -                         | -        |
| Asian# (2)                          | 16 (6.99)               | 16 (5.90)                  | 0.10                  | .7565    | 0                  | Fixed                | 1.13 (0.58 – 2.21)        | .7192    |
| Middle East (2)                     | 17 (7.02)               | 11 (4.47)                  | 0.06                  | .8116    | 0                  | Fixed                | 1.57 (0.75 – 3.26)        | .2311    |
| African (2)                         | 8 (2.04)                | 8 (1.83)                   | 5.88                  | .0153    | 83.0               | Random               | 2.18 (0.08 – 62.07)       | .6485    |
| AC (11)                             | 489 (34.31)             | 645 (34.70)                | 14.87                 | .1367    | 32.8               | Fixed                | 1.01 (0.92 – 1.11)        | .7807    |
| Caucasian (4)                       | 190 (46.00)             | 344 (45.62)                | 5.77                  | .1200    | 48                 | Fixed                | 0.97 (0.84 – 1.11)        | .6167    |
| South American (1)                  | 27 (18.00)              | 39 (26.00)                 | -                     | -        | -                  | -                    | -                         | .2538    |
| Asian# (2)                          | 109 (47.60)             | 119 (43.91)                | 0.01                  | .9035    | 0                  | Fixed                | 1.05 (0.87 – 1.27)        | .5987    |
| Middle East (2)                     | 83 (34.30)              | 69 (28.05)                 | 1.96                  | .1619    | 48.9               | Fixed                | 1.22 (0.94 – 1.58)        | .1337    |
| African (2)                         | 80 (20.36)              | 74 (16.89)                 | 2.02                  | .1556    | 50.4               | Fixed                | 1.09 (0.82 – 1.45)        | .5690    |
| AA (11)                             | 835 (58.60)             | 1106 (59.49)               | 7.97                  | .6383    | 0                  | Fixed                | 0.96 (0.91 – 1.02)        | .1773    |
| Caucasian (4)                       | 186 (45.04)             | 338 (44.83)                | 2.52                  | .4707    | 0                  | Fixed                | 1.05 (0.92 – 1.20)        | .4363    |
| South American (1)                  | 100 (66.67)             | 110 (73.33)                | -                     | -        | -                  | -                    | -                         | -        |
| Asian# (2)                          | 102 (44.54)             | 136 (50.18)                | 0.04                  | .8499    | 0                  | Fixed                | 0.94 (0.78 – 1.13)        | .4816    |
| Middle East (2)                     | 142 (56.68)             | 166 (67.48)                | 0.02                  | .8849    | 0                  | Fixed                | 0.87 (0.76 – 0.99)        | .0404    |
| African (2)                         | 305 (77.61)             | 356 (81.28)                | 0.00                  | .9788    | 0                  | Fixed                | 0.98 (0.91 – 1.05)        | .5004    |
| CC+AC                               | 590 (41.35)             | 753 (40.51)                | 9.15                  | .5182    | 0                  | Fixed                | 1.06 (0.97 – 1.15)        | .1815    |
| AA+AC                               | 1324 (92.78)            | 1751 (94.19)               | 42.93                 | <.0001   | 76.7               | Random               | 0.98 (0.94 – 1.02)        | .3086    |
| <b>Subgroups</b>                    |                         |                            |                       |          |                    |                      |                           |          |
| <b>CC Risk &gt; 1 (7 countries)</b> | 886 (62.18)             | 1290 (69.39)               |                       |          |                    |                      |                           |          |
| CC (8)                              | 84 (9.46)               | 77 (5.97)                  | 14.41                 | .0444    | 51.4               | Random               | 1.69 (0.99 – 2.88)        | .0540    |
| AC (8)                              | 309 (34.80)             | 484 (37.52)                | 10.74                 | .1502    | 34.8               | Fixed                | 0.95 (0.85 – 1.06)        | .3563    |
| AA (8)                              | 493 (55.52)             | 729 (56.51)                | 7.62                  | .3675    | 8.1                | Fixed                | 0.96 (0.89 – 1.03)        | .2845    |
| CC+AC (8)                           | 393 (44.36)             | 561 (43.49)                | 8.98                  | .2541    | 22.1               | Fixed                | 1.05 (0.95 – 1.16)        | .3091    |
| AA+AC (8)                           | 802 (90.52)             | 1113 (86.28)               | 17.52                 | .0143    | 60.1               | Random               | 0.95 (0.92 – 0.99)        | .0258    |
| <b>CC risk &lt; 1 (3 countries)</b> | 539 (37.82)             | 569 (30.61)                |                       |          |                    |                      |                           |          |
| CC (3)                              | 17 (3.15)               | 31 (5.45)                  | 2.26                  | .3232    | 11.5               | Fixed                | 0.55 (0.29 – 1.02)        | .0569    |
| AC (3)                              | 180 (33.40)             | 161 (28.30)                | 0.37                  | .8308    | 0                  | Fixed                | 1.17 (0.98 – 1.39)        | .0769    |
| AA(3)                               | 342 (63.45)             | 377 (66.26)                | 0.32                  | .8529    | 0                  | Fixed                | 0.96 (0.89 – 1.05)        | .3779    |
| CC+AC (3)                           | 197 (36.55)             | 192 (33.74)                | 0.04                  | .9826    | 0                  | Fixed                | 1.07 (0.92 – 1.25)        | .3789    |
| AA+AC (3)                           | 522 (96.85)             | 538 (94.55)                | 6.29                  | .0431    | 68.2               | Random               | 1.04 (0.99 – 1.10)        | .1502    |

Note:

1. #: Asia include East and South Asia

2. CC risk > 1 (7 countries): Netherland (2 studies), Ecuador, China, Sri Lanka, Iran, Turkey, and Tunisia

3. CC risk < 1 (3 countries): Australia, Spain, and South Africa



Table S4a. Pooled meta-analysis: *MTHFR C677T polymorphism* and risks of hypertensive disorders in pregnancy (HDP) per HDP types. (71 studies)

| Genotype<br>(number of<br>studies) | Case<br>N= 8064<br>n (%) | Control<br>N= 13232<br>n (%) | Test of Heterogeneity |       |                       | Statistical<br>Model | Test of Association             |        |
|------------------------------------|--------------------------|------------------------------|-----------------------|-------|-----------------------|----------------------|---------------------------------|--------|
|                                    |                          |                              | Q                     | p     | I <sup>2</sup><br>(%) |                      | Relative risk ratio<br>(95% CI) | p      |
| <b>TT (71)</b>                     | 1087 (13.48)             | 1410 (10.66)                 | 107.30                | .0028 | 34.8                  | Random               | 1.28 (1.15 – 1.43)              | <.0001 |
| <b>PE (57)</b>                     | 799 (13.61)              | 1221 (10.58)                 | 94.98                 | .0009 | 41.0                  | Random               | 1.29 (1.13 – 1.47)              | .0001  |
| Caucasian (25)                     | 330 (11.71)              | 669 (9.75)                   | 25.02                 | .4046 | 4.1                   | Fixed                | 1.15 (1.00 – 1.32)              | .0473  |
| Hispanic (6)                       | 177 (30.68)              | 282 (30.62)                  | 9.09                  | .1057 | 45.0                  | Fixed                | 0.98 (0.83 – 1.15)              | .7838  |
| South American (4)                 | 62 (16.40)               | 66 (11.89)                   | 1.47                  | .6891 | 0                     | Fixed                | 1.40 (1.01 – 1.93)              | .0405  |
| East Asian (8)                     | 156 (29.38)              | 139 (11.08)                  | 10.89                 | .1433 | 35.7                  | Fixed                | 2.06 (1.68 – 2.53)              | <.0001 |
| South Asian (4)                    | 15 (2.67)                | 31 (3.13)                    | 0.73                  | .8654 | 0                     | Fixed                | 0.94 (0.49 – 1.81)              | .8606  |
| Middle East (6)                    | 40 (6.21)                | 34 (6.46)                    | 6.35                  | .2734 | 21.3                  | Fixed                | 0.92 (0.58 – 1.46)              | .7254  |
| African (4)                        | 19 (5.22)                | 0                            | 1.92                  | .5901 | 0                     | Fixed                | 11.38 (2.73 – 47.55)            | .0009  |
| <b>GH (4)</b>                      | 80 (23.81)               | 47 (14.37)                   | 2.44                  | .4872 | 0                     | Fixed                | 1.65 (1.20 – 2.29)              | .0023  |
| East Asian (3)                     | 66 (27.97)               | 35 (15.56)                   | 1.38                  | .5015 | 0                     | Fixed                | 1.81 (1.26 – 2.60)              | .0014  |
| Middle East (1)                    | 14 (14.00)               | 12 (11.76)                   | -                     | -     | -                     | -                    | -                               | -      |
| <b>Mix (10)</b>                    | 208 (11.21)              | 142 (10.44)                  | 5.00                  | .8344 | 0                     | Fixed                | 1.08 (0.87 – 1.33)              | .4837  |
| Caucasian (2)                      | 95 (11.45)               | 31 (11.15)                   | 0.22                  | .6412 | 0                     | Fixed                | 1.11 (0.75 – 1.65)              | .5927  |
| Hispanic (1)                       | 38 (20.21)               | 43 (22.16)                   | -                     | -     | -                     | -                    | -                               | -      |
| East Asian (6)                     | 74 (15.16)               | 66 (12.00)                   | 3.21                  | .6683 | 0                     | Fixed                | 1.20 (0.86 – 1.68)              | .2845  |
| African (1)                        | 1 (0.29)                 | 2 (0.59)                     | -                     | -     | -                     | -                    | -                               | -      |
| <b>CT (71)</b>                     | 3142 (38.96)             | 5166 (39.04)                 | 103.13                | .0049 | 33.1                  | Random               | 1.01 (0.96 – 1.06)              | .7256  |
| <b>PE (57)</b>                     | 2229 (37.95)             | 4575 (39.63)                 | 61.38                 | .258  | 10.4                  | Fixed                | 0.98 (0.93 – 1.02)              | .2461  |
| Caucasian (25)                     | 1159 (41.13)             | 2889 (42.11)                 | 19.57                 | .6674 | 0                     | Fixed                | 1.01 (0.95 – 1.07)              | .8459  |
| Hispanic (6)                       | 269 (46.62)              | 427 (46.36)                  | 2.53                  | .7712 | 0                     | Fixed                | 1.01 (0.91 – 1.13)              | .8015  |
| South American (4)                 | 173 (45.77)              | 258 (46.49)                  | 3.24                  | .3558 | 7.5                   | Fixed                | 0.94 (0.81 – 1.08)              | .3468  |
| East Asian (8)                     | 234 (44.07)              | 531 (42.31)                  | 10.00                 | .1887 | 30.0                  | Fixed                | 0.88 (0.78 – 0.99)              | .0354  |
| South Asian (4)                    | 94 (16.76)               | 199 (20.08)                  | 7.74                  | .0516 | 61.3                  | Fixed                | 0.77 (0.61 – 0.98)              | .0335  |
| Middle East (6)                    | 214 (33.23)              | 159 (30.23)                  | 5.59                  | .3481 | 10.6                  | Fixed                | 1.05 (0.88 – 1.24)              | .5985  |
| African (4)                        | 86 (23.63)               | 112 (25.63)                  | 4.63                  | .2006 | 35.3                  | Fixed                | 1.00 (0.79 – 1.26)              | .9787  |
| <b>GH (4)</b>                      | 156 (46.43)              | 153 (46.79)                  | 11.79                 | .0081 | 74.6                  | Random               | 0.99 (0.70 – 1.41)              | .9751  |
| East Asian (3)                     | 103 (43.64)              | 106 (47.11)                  | 10.23                 | .006  | 80.4                  | Random               | 0.94 (0.57 – 1.56)              | .8131  |
| Middle East (1)                    | 53 (53.00)               | 47 (46.08)                   | -                     | -     | -                     | -                    | -                               | -      |
| <b>Mix (10)</b>                    | 757 (40.81)              | 438 (32.21)                  | 20.39                 | .0157 | 55.9                  | Random               | 1.22 (1.04 – 1.43)              | .0162  |
| Caucasian (2)                      | 405 (48.80)              | 112 (40.29)                  | 0.06                  | .8129 | 0                     | Fixed                | 1.20 (1.02 – 1.42)              | .0281  |
| Hispanic (1)                       | 91 (48.80)               | 97 (50.00)                   | -                     | -     | -                     | -                    | -                               | -      |
| East Asian (6)                     | 211 (43.24)              | 191 (34.73)                  | 16.19                 | .0063 | 69.1                  | Random               | 1.35 (0.98 – 1.86)              | .0621  |
| African (1)                        | 50 (14.33)               | 38 (11.24)                   | -                     | -     | -                     | -                    | -                               | -      |
| <b>CC (71)</b>                     | 3835 (47.56)             | 6656 (50.30)                 | 120.18                | .0002 | 41.8                  | Random               | 0.94 (0.90 – 0.98)              | .0017  |
| <b>PE (57)</b>                     | 2845 (48.44)             | 5749 (49.80)                 | 72.50                 | .0682 | 22.8                  | Fixed                | 0.96 (0.93 – 0.99)              | .0313  |
| Caucasian (25)                     | 1329 (47.16)             | 3302 (48.13)                 | 18.46                 | .7803 | 0                     | Fixed                | 0.96 (0.91 – 1.02)              | .1639  |
| Hispanic (6)                       | 131 (22.70)              | 212 (23.02)                  | 5.66                  | .3409 | 11.6                  | Fixed                | 1.00 (0.83 – 1.21)              | .996   |
| South American (4)                 | 143 (37.83)              | 231 (41.62)                  | 4.85                  | .1833 | 38.1                  | Fixed                | 0.96 (0.81 – 1.13)              | .6263  |
| East Asian (8)                     | 141 (26.55)              | 585 (46.61)                  | 7.39                  | .3897 | 5.2                   | Fixed                | 0.76 (0.65 – 0.88)              | .0004  |
| South Asian (4)                    | 452 (80.57)              | 761 (76.79)                  | 9.64                  | .0219 | 68.9                  | Random               | 1.06 (0.95 – 1.17)              | .3296  |
| Middle East (6)                    | 390 (60.56)              | 333 (63.31)                  | 5.29                  | .3818 | 5.4                   | Fixed                | 0.99 (0.90 – 1.08)              | .7435  |
| African (4)                        | 259 (71.15)              | 325 (74.37)                  | 4.99                  | .1724 | 39.9                  | Fixed                | 0.93 (0.86 – 1.00)              | .0864  |
| <b>GH (4)</b>                      | 100 (29.76)              | 127 (38.84)                  | 6.67                  | .0831 | 55.0                  | Fixed                | 0.76 (0.62 – 0.94)              | .0106  |
| East Asian (3)                     | 67 (28.39)               | 84 (37.33)                   | 6.70                  | .0351 | 70.1                  | Random               | 0.80 (0.50 – 1.29)              | .3628  |
| Middle East (1)                    | 33 (33.00)               | 43 (42.16)                   | -                     | -     | -                     | -                    | -                               | -      |
| <b>Mix (10)</b>                    | 890 (47.98)              | 780 (57.35)                  | 33.60                 | .0001 | 73.2                  | Random               | 0.83 (0.71 – 0.96)              | .0102  |
| Caucasian (2)                      | 330 (39.76)              | 135 (48.56)                  | 0.03                  | .8672 | 0                     | Fixed                | 0.81 (0.69 – 0.94)              | .0062  |
| Hispanic (1)                       | 59 (31.38)               | 54 (27.84)                   | -                     | -     | -                     | -                    | -                               | -      |
| East Asian (6)                     | 203 (41.60)              | 293 (53.27)                  | 15.01                 | .0103 | 66.0%                 | Random               | 0.75 (0.59 – 0.95)              | .0159  |
| African (1)                        | 298 (85.39)              | 298 (88.17)                  | -                     | -     | -                     | -                    | -                               | -      |
| <b>TT+CT (71)</b>                  | 4229 (52.44)             | 6576 (49.70)                 | 106.46                | .0033 | 34.2                  | Random               | 1.07 (1.03 – 1.11)              | .0002  |

|                    |              |               |        |        |      |        |                    |        |
|--------------------|--------------|---------------|--------|--------|------|--------|--------------------|--------|
| <b>PE (57)</b>     | 2845 (48.44) | 5749 (49.80)  | 67.96  | .1313  | 17.6 | Fixed  | 1.04 (1.00 – 1.07) | .0287  |
| Caucasian (25)     | 1489 (52.84) | 3558 (51.87)  | 18.67  | .7694  | 0    | Fixed  | 1.03 (0.99 – 1.08) | .1559  |
| Hispanic (6)       | 446 (77.30)  | 709 (76.98)   | 5.78   | .3285  | 13.5 | Fixed  | 1.00 (0.94 – 1.06) | .9961  |
| South American (4) | 235 (62.17)  | 324 (58.38)   | 5.38   | .146   | 44.2 | Fixed  | 1.03 (0.93 – 1.14) | .6174  |
| East Asian (8)     | 390 (73.45)  | 670 (53.39)   | 6.35   | .4993  | 0    | Fixed  | 1.15 (1.07 – 1.23) | .0001  |
| South Asian (4)    | 109 (19.43)  | 230 (23.21)   | 7.93   | .0475  | 62.2 | Random | 0.83 (0.56 – 1.22) | .3382  |
| Middle East (6)    | 254 (39.44)  | 193 (36.69)   | 4.96   | .4211  | 0    | Fixed  | 1.02 (0.89 – 1.19) | .743   |
| African (4)        | 105 (28.85)  | 112 (25.63)   | 1.56   | .6695  | 0    | Fixed  | 1.20 (0.98 – 1.48) | .0801  |
| <b>GH (4)</b>      | 236 (70.24)  | 200 (61.16)   | 8.35   | .0393  | 64.1 | Random | 1.14 (0.94 – 1.38) | .1749  |
| East Asian (3)     | 169 (71.61)  | 141 (62.67)   | 8.30   | .0158  | 75.9 | Random | 1.14 (0.85 – 1.52) | .3868  |
| Middle East (1)    | 67 (67.00)   | 59 (57.84)    | -      | -      | -    | -      | -                  | -      |
| <b>Mix (10)</b>    | 965 (52.02)  | 580 (42.65)   | 27.82  | .001   | 67.6 | Random | 1.21 (1.05 – 1.26) | <.0001 |
| Caucasian (2)      | 500 (60.24)  | 143 (51.44)   | 0.00   | .9652  | 0    | Fixed  | 1.18 (1.04 – 1.35) | .0116  |
| Hispanic (1)       | 129 (68.62)  | 140 (72.16)   | -      | -      | -    | -      | -                  | -      |
| East Asian (6)     | 285 (58.40)  | 257 (46.73)   | 18.19  | .0027  | 72.5 | Random | 1.34 (1.04 – 1.72) | .0251  |
| African (1)        | 51 (14.61)   | 40 (11.83)    | -      | -      | -    | -      | -                  | -      |
| <b>CC+CT (71)</b>  | 6977 (86.52) | 11822 (89.34) | 185.18 | <.0001 | 62.3 | Random | 0.98 (0.96 – 0.99) | .0023  |
| <b>PE (57)</b>     | 5074 (86.40) | 10324 (89.42) | 128.50 | <.0001 | 56.4 | Random | 0.97 (0.96 – 0.98) | <.0001 |
| Caucasian (25)     | 2488 (88.29) | 6191 (90.25)  | 24.83  | .415   | 3.3  | Fixed  | 0.98 (0.97 – 1.00) | .0552  |
| Hispanic (6)       | 400 (69.32)  | 639 (69.38)   | 9.92   | .0776  | 49.6 | Fixed  | 1.01 (0.94 – 1.08) | .7806  |
| South American (4) | 316 (83.60)  | 489 (88.11)   | 2.25   | .5215  | 0    | Fixed  | 0.95 (0.90 – 0.99) | .0475  |
| East Asian (8)     | 375 (70.62)  | 1116 (88.92)  | 5.61   | .5854  | 0    | Fixed  | 0.83 (0.78 – 0.88) | <.0001 |
| South Asian (4)    | 546 (97.33)  | 960 (96.87)   | 0.78   | .8549  | 0    | Fixed  | 1.00 (0.98 – 1.02) | .8334  |
| Middle East (6)    | 604 (93.79)  | 492 (93.54)   | 8.34   | .1383  | 40.1 | Fixed  | 1.01 (0.98 – 1.04) | .7176  |
| African (4)        | 345 (94.78)  | 437 (100.0)   | 56.03  | <.0001 | 94.6 | Random | 0.94 (0.87 – 1.02) | .1506  |
| <b>GH (4)</b>      | 256 (29.76)  | 280 (85.63)   | 7.27   | .0635  | 58.8 | Fixed  | 0.89 (0.83 – 0.96) | .002   |
| East Asian (3)     | 170 (76.19)  | 190 (84.44)   | 4.66   | .0975  | 57.0 | Fixed  | 0.85 (0.77 – 0.94) | .0012  |
| Middle East (1)    | 86 (86.00)   | 90 (88.24)    | -      | -      | -    | -      | -                  | -      |
| <b>Mix (10)</b>    | 1647 (88.79) | 1218 (89.56)  | 10.35  | .3229  | 13.0 | Fixed  | 0.99 (0.97 – 1.02) | .4767  |
| Caucasian (2)      | 735 (88.55)  | 247 (88.85)   | 0.30   | .5846  | 0    | Fixed  | 0.99 (0.94 – 1.04) | .5888  |
| Hispanic (1)       | 150 (79.79)  | 151 (77.84)   | -      | -      | -    | -      | -                  | -      |
| East Asian (6)     | 414 (84.84)  | 484 (88.00)   | 3.37   | .6436  | 0    | Fixed  | 0.97 (0.93 – 1.02) | .2698  |
| African (1)        | 348 (99.71)  | 336 (99.41)   | -      | -      | -    | -      | -                  | -      |

PE: pre-eclampsia, eclampsia and HELLP syndrome; GH: gestational hypertension; Mix: combined PE and GH

Table S4b. Pooled meta-analysis: *MTHFR A1298C polymorphism* and risk of hypertensive disorders in pregnancy (HDP) per HDP types. (11 studies)

| Genotype<br>(number of studies) | Case<br>N=1425<br>n (%) | Control<br>N=1859<br>n (%) | Test of Heterogeneity |        |                | Statistical<br>Model | Test of Association             |       |
|---------------------------------|-------------------------|----------------------------|-----------------------|--------|----------------|----------------------|---------------------------------|-------|
|                                 |                         |                            | Q                     | p      | I <sup>2</sup> |                      | Relative risk ratio<br>(95% CI) | p     |
| <b>CC (11)</b>                  | 101 (7.09)              | 108 (5.81)                 | 19.83                 | .0309  | 49.6%          | Random               | 1.30 (0.82 – 2.07)              | .2586 |
| <b>PE (9)</b>                   | 94 (9.18)               | 96 (6.76)                  | 17.61                 | .0244  | 54.6%          | Random               | 1.45 (0.87 – 2.45)              | .1576 |
| Caucasian (4)                   | 37 (8.96)               | 72 (9.55)                  | 3.73                  | .2926  | 19.5%          | Fixed                | 0.92 (0.62 – 1.35)              | .6603 |
| South American (1)              | 23 (15.33)              | 1 (0.67)                   | -                     | -      | -              | -                    | -                               | -     |
| South Asian (1)                 | 13 (7.51)               | 12 (7.02)                  | -                     | -      | -              | -                    | -                               | -     |
| Middle East (2)                 | 17 (7.02)               | 11 (4.47)                  | 0.06                  | .8116  | 0%             | Fixed                | 1.57 (0.75 – 3.26)              | .2311 |
| African (1)                     | 4 (9.09)                | 0 (0.00)                   | -                     | -      | -              | -                    | -                               | -     |
| <b>GH</b> East Asian (1)        | 3(5.56)                 | 4 (4.00)                   | -                     | -      | -              | -                    | -                               | -     |
| <b>Mix</b> African (1)          | 4 (1.18)                | 8 (2.37)                   | -                     | -      | -              | -                    | -                               | -     |
| <b>AC (11)</b>                  | 489 (34.31)             | 645 (34.70)                | 14.81                 | .1393  | 32.5%          | Fixed                | 1.01 (0.92 – 1.11)              | .8107 |
| <b>PE (9)</b>                   | 389 (37.99)             | 542 (38.14)                | 14.01                 | .0816  | 42.9%          | Fixed                | 0.99 (0.89 – 1.10)              | .8137 |
| Caucasian (4)                   | 190 (46.00)             | 344 (45.62)                | 5.77                  | .1232  | 48.0%          | Fixed                | 0.97 (0.84 – 1.11)              | .6167 |
| South American (1)              | 27 (18.00)              | 39 (26.00)                 | -                     | -      | -              | -                    | -                               | -     |
| South Asian (1)                 | 89 (51.45)              | 83 (48.54)                 | -                     | -      | -              | -                    | -                               | -     |
| Middle East (2)                 | 83 (34.30)              | 69 (28.05)                 | 1.96                  | .1619  | 48.9%          | Fixed                | 1.22 (0.94 – 1.58)              | .1337 |
| African (1)                     | 0 (0.00)                | 7 (7.00)                   | -                     | -      | -              | -                    | -                               | -     |
| <b>GH</b> East Asian (1)        | 20 (37.04)              | 36 (36.00)                 | -                     | -      | -              | -                    | -                               | -     |
| <b>Mix</b> African (1)          | 80 (22.92)              | 67 (19.82)                 | -                     | -      | -              | -                    | -                               | -     |
| <b>AA (11)</b>                  | 835 (58.60)             | 1106 (59.49)               | 7.97                  | .6321  | 0%             | Fixed                | 0.96 (0.91 – 1.02)              | .1671 |
| <b>PE (9)</b>                   | 539 (52.64)             | 783 (55.10)                | 7.77                  | .4564  | 0%             | Fixed                | 0.96 (0.89 – 1.03)              | .225  |
| Caucasian (4)                   | 186 (45.04)             | 338 (44.83)                | 2.53                  | .4707  | 0%             | Fixed                | 1.05 (0.92 – 1.20)              | .4363 |
| South American (1)              | 100 (66.76)             | 110 (73.33)                | -                     | -      | -              | -                    | -                               | -     |
| South Asian (1)                 | 71 (41.04)              | 76 (44.44)                 | -                     | -      | -              | -                    | -                               | -     |
| Middle East (2)                 | 142 (58.68)             | 166 (67.48)                | 0.02                  | .8849  | 0%             | Fixed                | 0.87 (0.76 – 0.99)              | .0404 |
| African (1)                     | 40 (90.91)              | 93 (93.00)                 | -                     | -      | -              | -                    | -                               | -     |
| <b>GH</b> East Asian (1)        | 31 (57.40)              | 60 (60.00)                 | -                     | -      | -              | -                    | -                               | -     |
| <b>Mix</b> African (1)          | 265 (75.93)             | 263 (77.81)                | -                     | -      | -              | -                    | -                               | -     |
| <b>CC+AC (11)</b>               | 590 (41.35)             | 753 (40.51)                | 9.12                  | .5206  | 0%             | Fixed                | 1.06 (0.97 – 1.15)              | .1965 |
| <b>PE (9)</b>                   | 483 (47.26)             | 638 (44.90)                | 9.04                  | .3388  | 11.5%          | Fixed                | 1.05 (0.97 – 1.15)              | .2459 |
| Caucasian (4)                   | 227 (54.96)             | 416 (55.17)                | 2.66                  | .4478  | 0%             | Fixed                | 0.96 (0.85 – 1.07)              | .4504 |
| South American (1)              | 50 (33.33)              | 40 (26.67)                 | -                     | -      | -              | -                    | -                               | -     |
| South Asian (1)                 | 102 (58.96)             | 95 (55.56)                 | -                     | -      | -              | -                    | -                               | -     |
| Middle East (2)                 | 100 (41.32)             | 80 (32.52)                 | 1.55                  | .2135  | 0%             | Fixed                | 1.27 (1.01 – 1.59)              | .0403 |
| African (1)                     | 4 (9.09)                | 7 (7.00)                   | -                     | -      | -              | -                    | -                               | -     |
| <b>GH</b> East Asian (1)        | 23 (42.59)              | 40 (40.00)                 | -                     | -      | -              | -                    | -                               | -     |
| <b>Mix</b> African (1)          | 84 (24.07)              | 75 (22.19)                 | -                     | -      | -              | -                    | -                               | -     |
| <b>AA+AC (11)</b>               | 1324 (92.78)            | 1751 (94.19)               | 43.53                 | <.0001 | 77.0%          | Random               | 0.98 (0.94 – 1.02)              | .2826 |
| <b>PE (9)</b>                   | 928 (90.80)             | 1325 (93.24)               | 31.88                 | <.0001 | 74.9%          | Random               | 0.97 (0.93 – 1.02)              | .2493 |
| Caucasian (4)                   | 376 (91.04)             | 682 (90.45)                | 7.07                  | .0695  | 57.6%          | Fixed                | 1.01 (0.97 – 1.05)              | .6944 |
| South American (1)              | 127 (84.67)             | 149 (99.33)                | -                     | -      | -              | -                    | -                               | -     |
| South Asian (1)                 | 160 (92.49)             | 159 (92.98)                | -                     | -      | -              | -                    | -                               | -     |
| Middle East (2)                 | 225 (92.98)             | 235 (95.53)                | 0.53                  | .4669  | 0%             | Fixed                | 0.97 (0.93 – 1.02)              | .2279 |
| African (1)                     | 40 (90.91)              | 100 (100)                  | -                     | -      | -              | -                    | -                               | -     |
| <b>GH</b> East Asian (1)        | 51 (94.44)              | 96 (96.00)                 | -                     | -      | -              | -                    | -                               | -     |
| <b>Mix</b> African (1)          | 345 (98.85)             | 330 (97.63)                | -                     | -      | -              | -                    | -                               | -     |

PE: pre-eclampsia, eclampsia and HELLP syndrome; GH: gestational hypertension; Mix: combined PE and GH

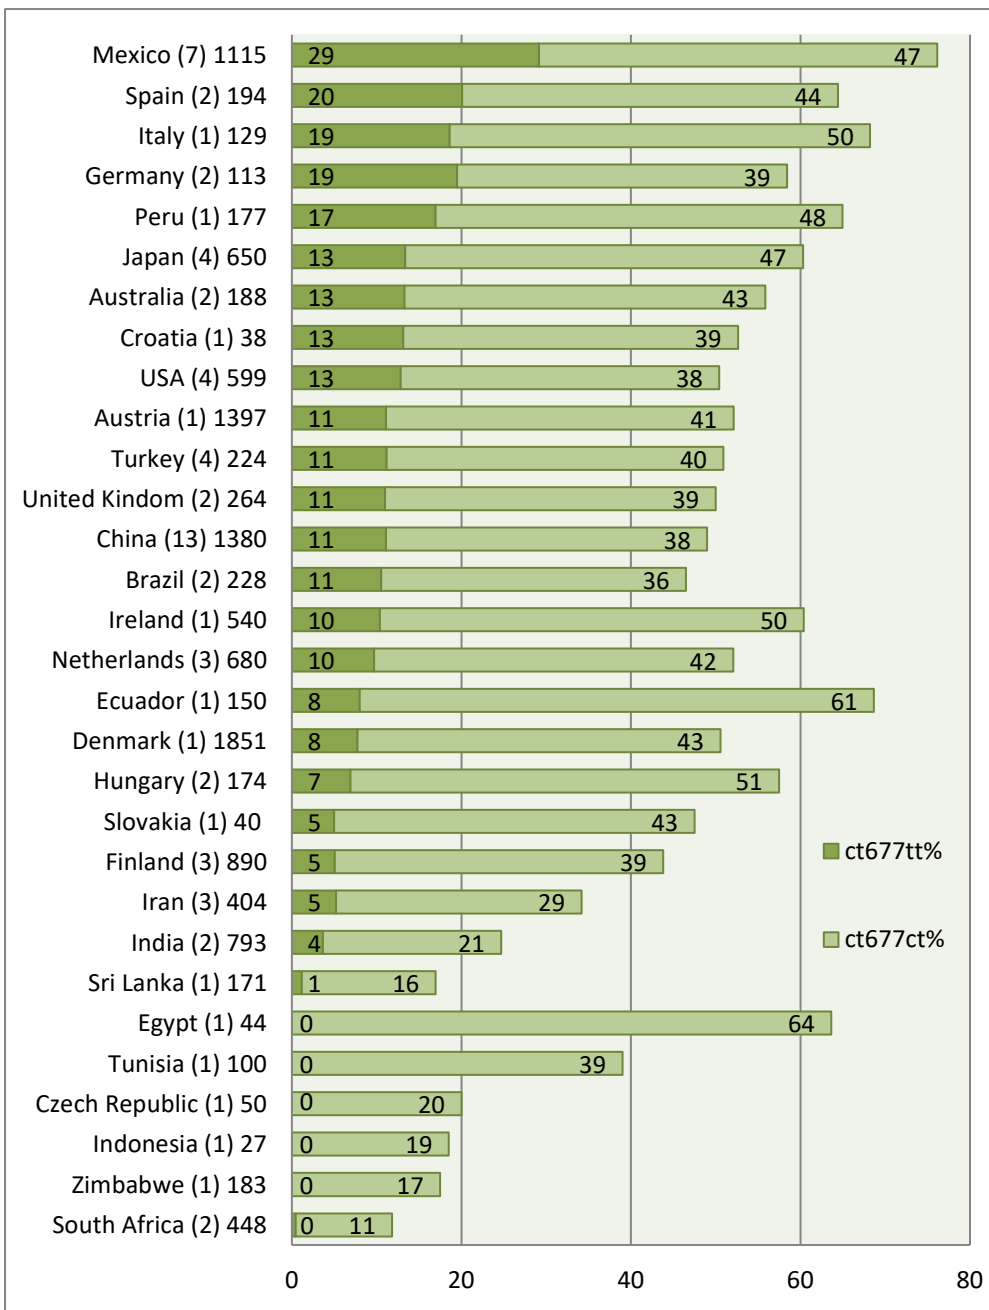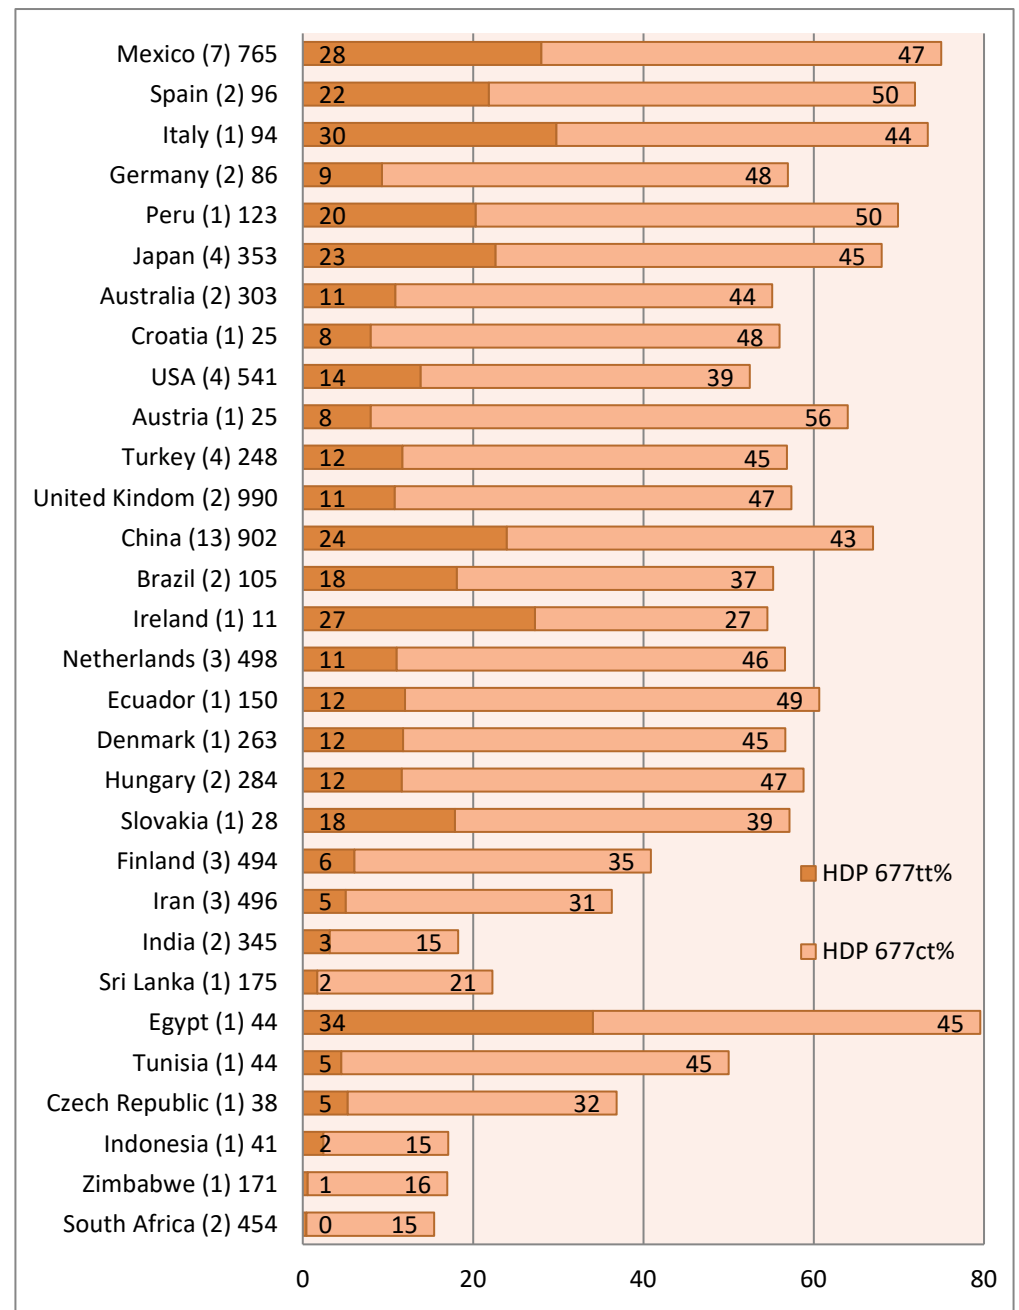

Figure S1a. The percentage of *MTHFR* 677 CT and TT polymorphisms per control and hypertensive disorders in pregnancy (HDP) case groups.

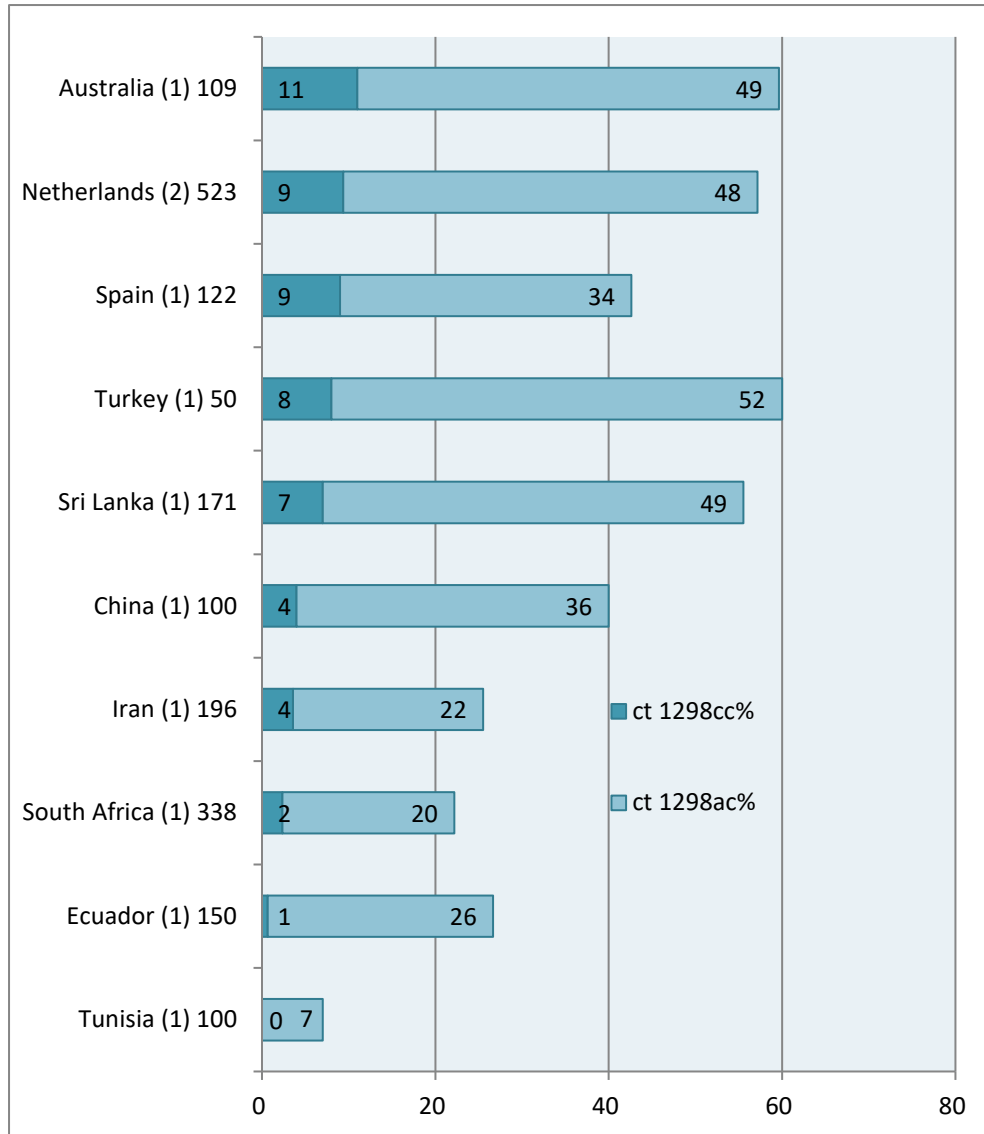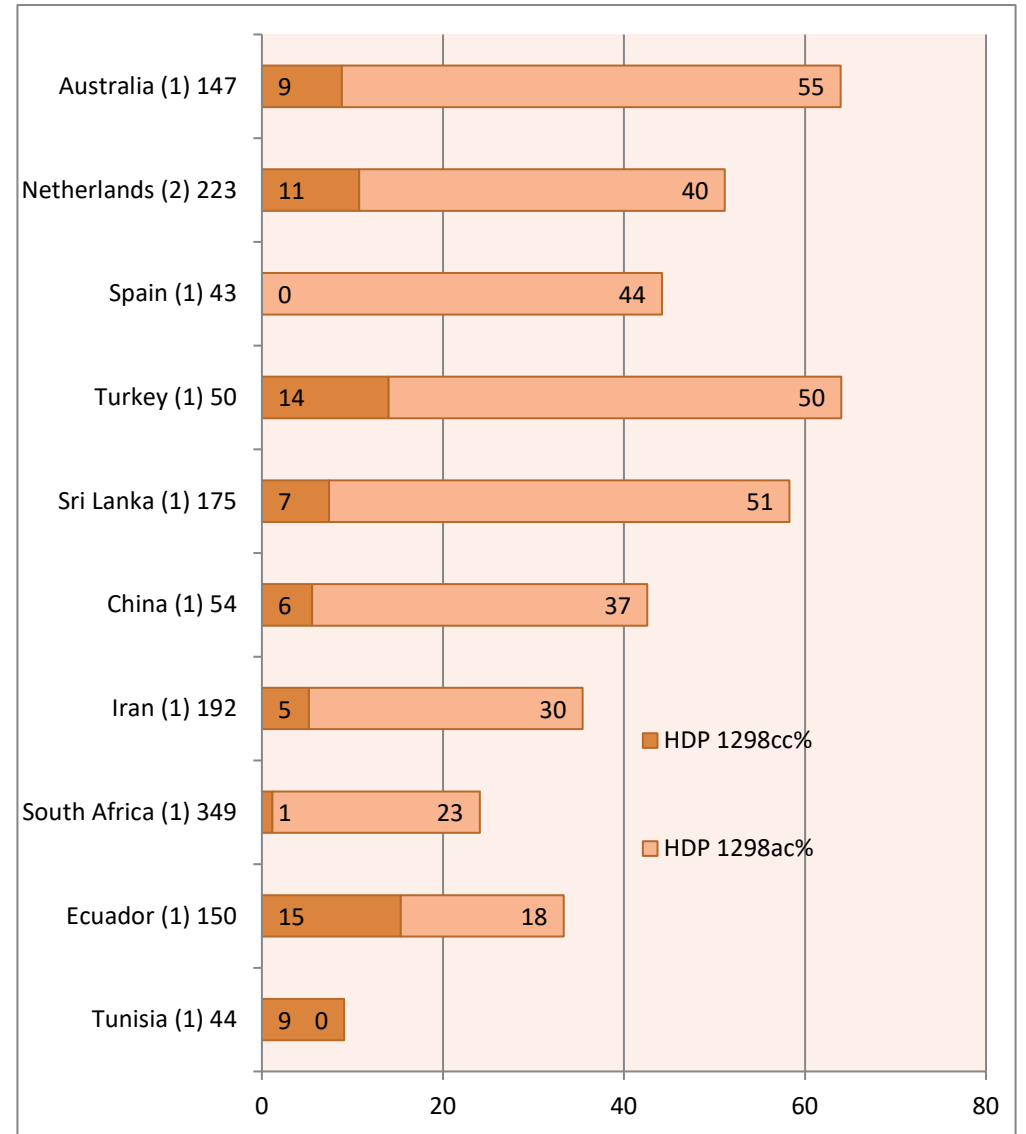

Figure S1b. The percentage of *MTHFR* 1298 AC and CC polymorphisms per control and hypertensive disorders in pregnancy (HDP) case groups.

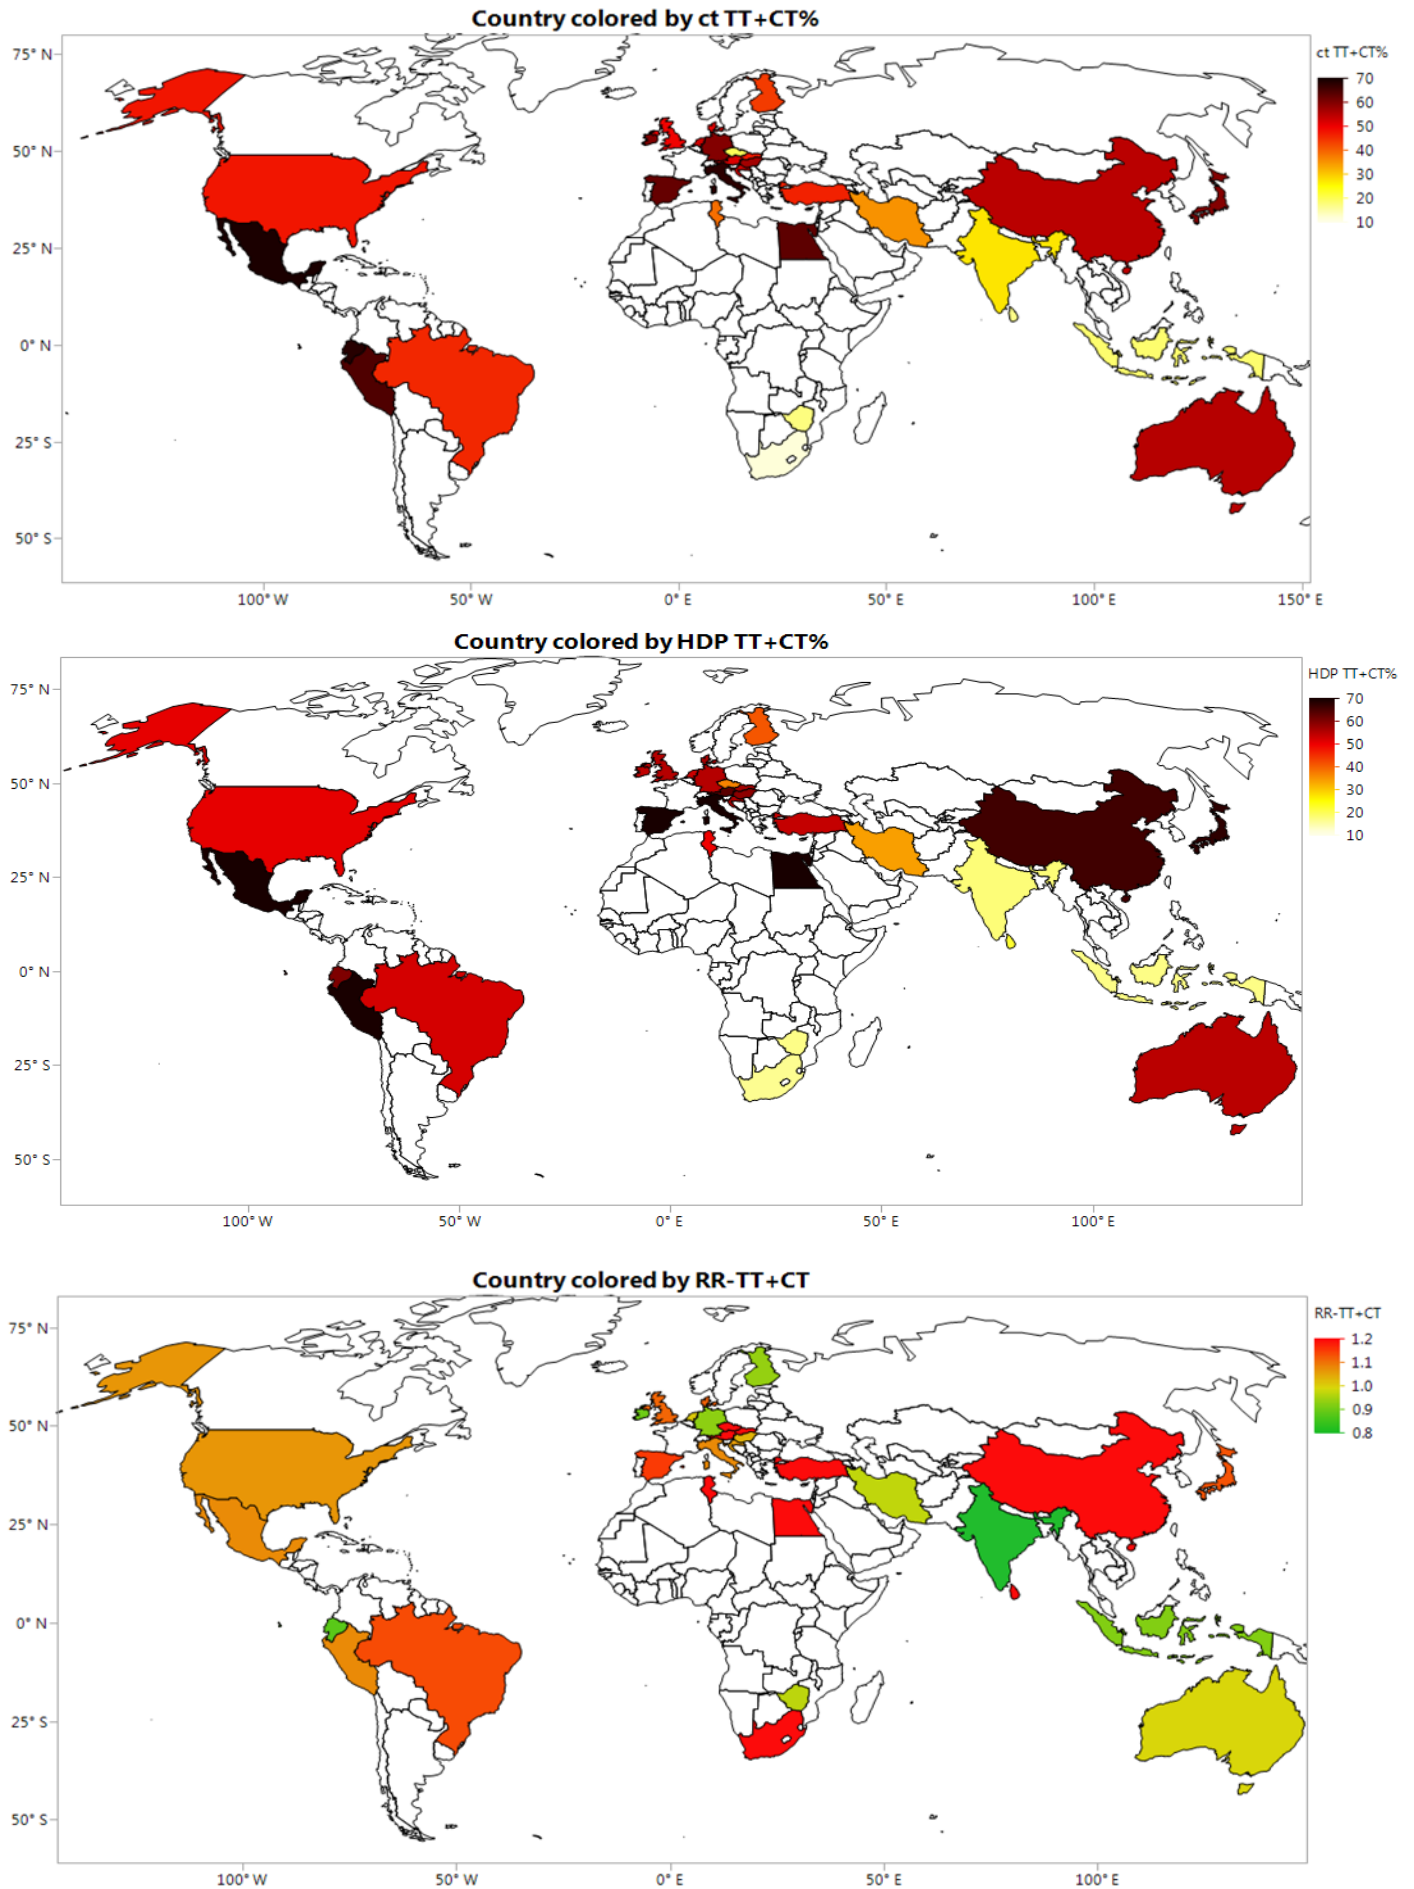

Figure S2a. Geographic information maps for % *MTHFR* 677 *TT* plus *CT* polymorphism per control and hypertensive disorders in pregnancy (HDP) groups, and HDP risks.

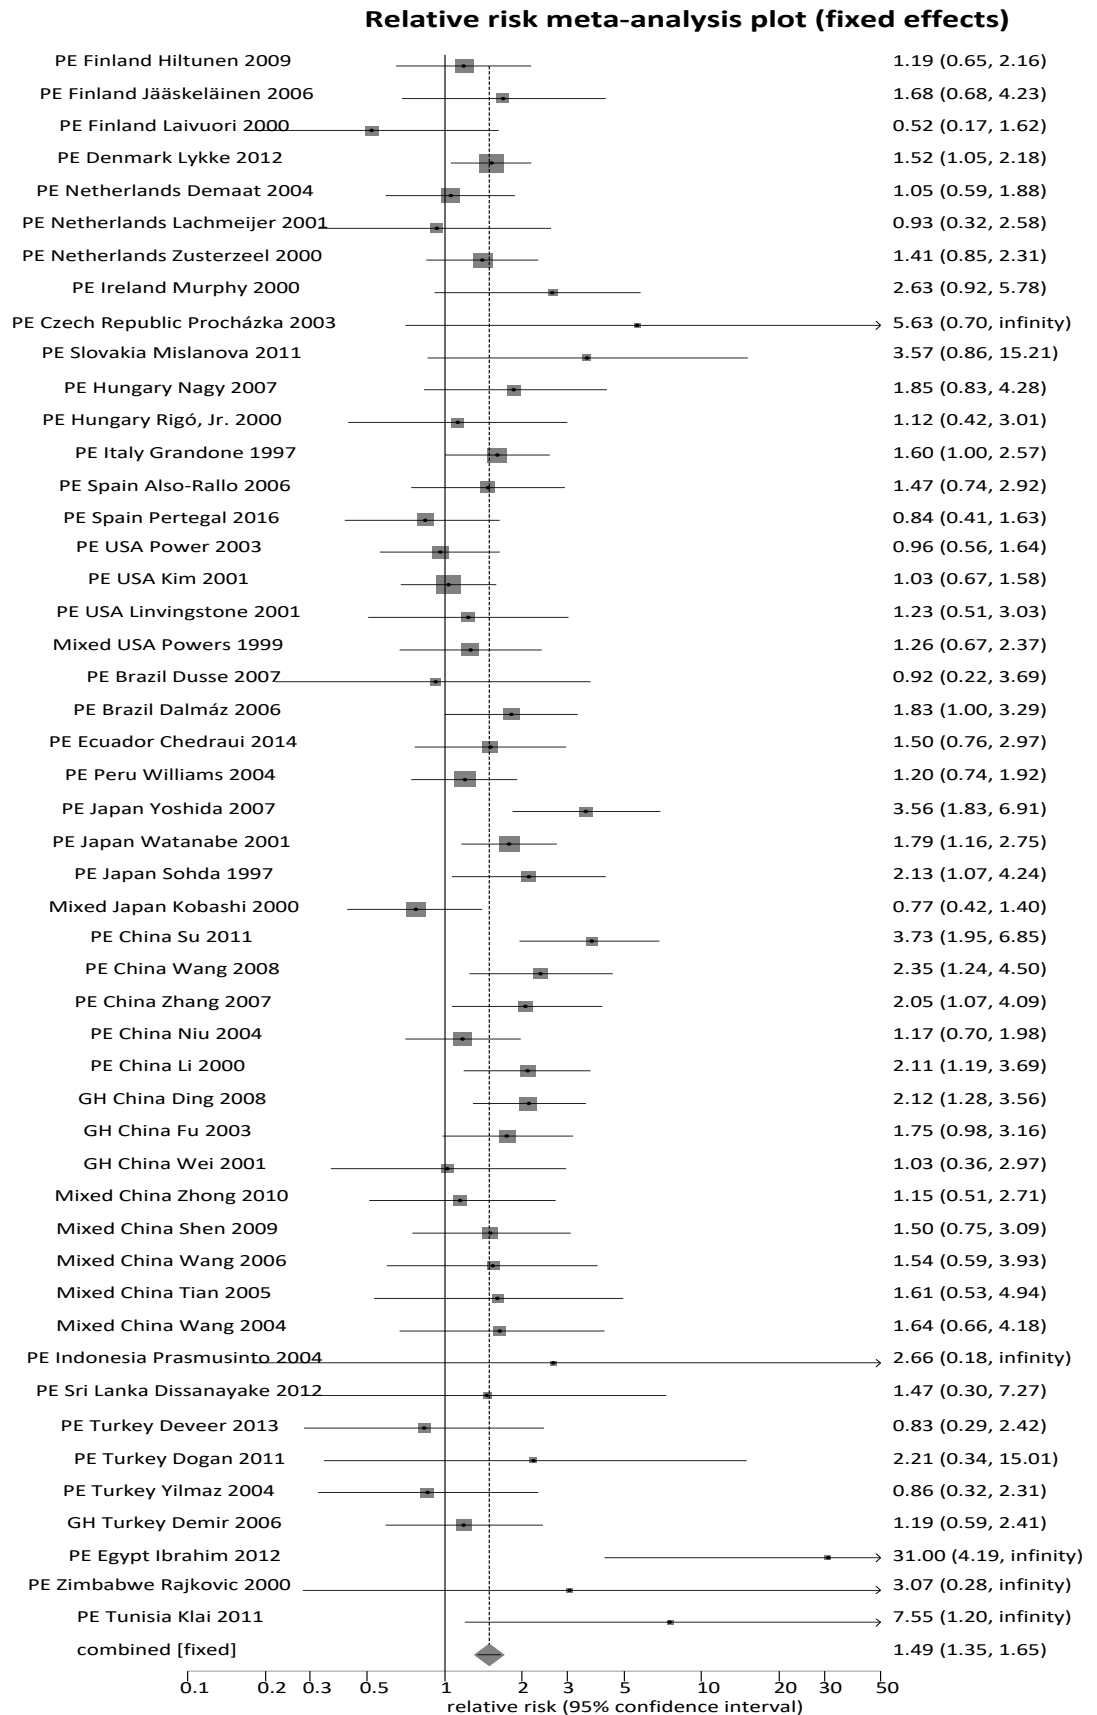

Figure S3a. Forest plot for *MTHFR C677T* with types of hypertensive disorders in pregnancy for countries of *TT* risk > 1.

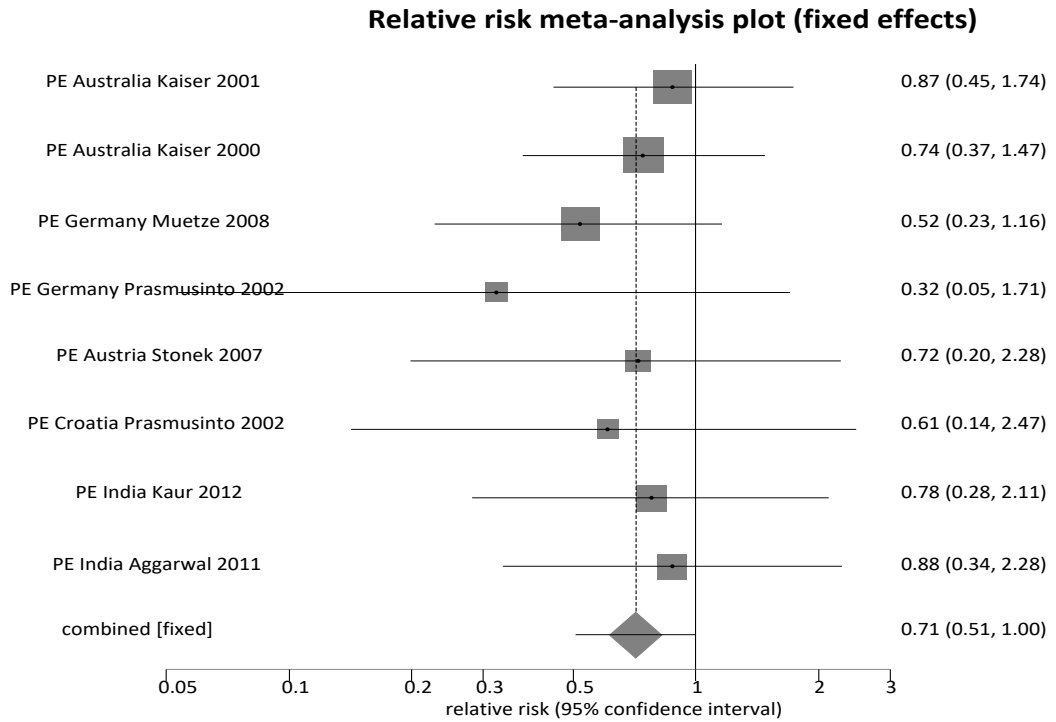

Figure S3b. Forest plot for *MTHFR C677T* with types of hypertensive disorders in pregnancy for countries of *TT* risk < 1.

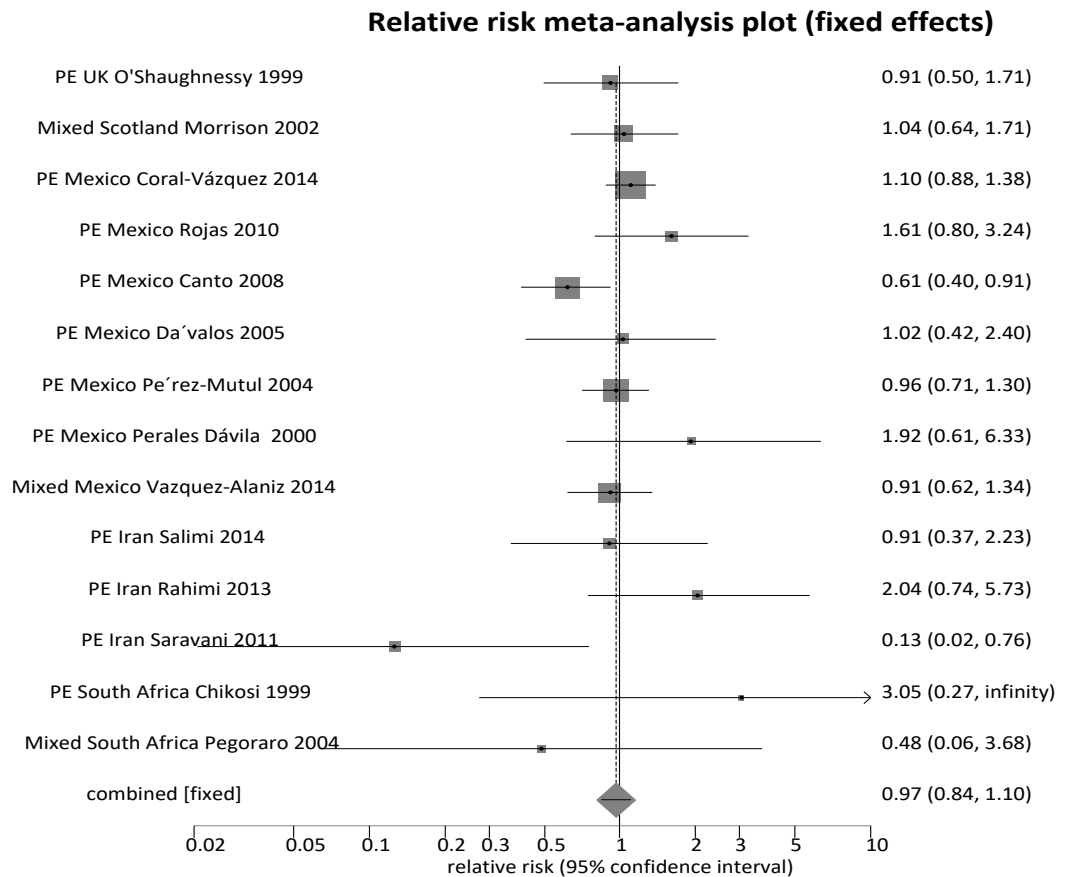

Figure S3c. Forest plot for *MTHFR C677T* with types of hypertensive disorders in pregnancy for countries of *TT* risk ~ 1.



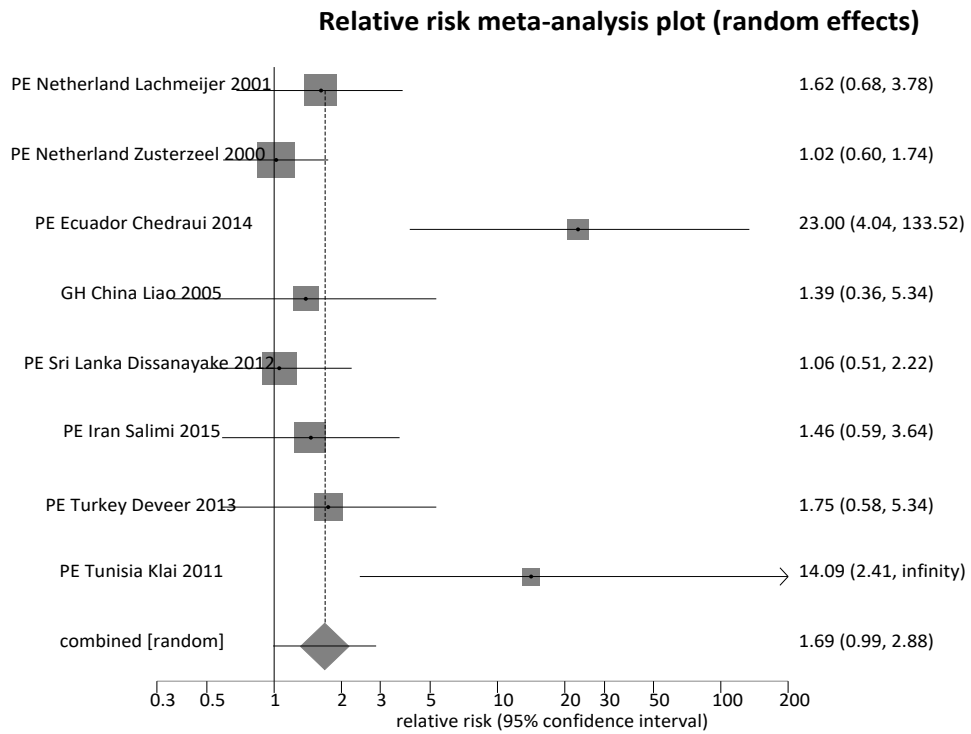

Figure S4a. Forest plot for *MTHFR A1298C* with types of hypertensive disorders in pregnancy for countries of CC risk > 1.

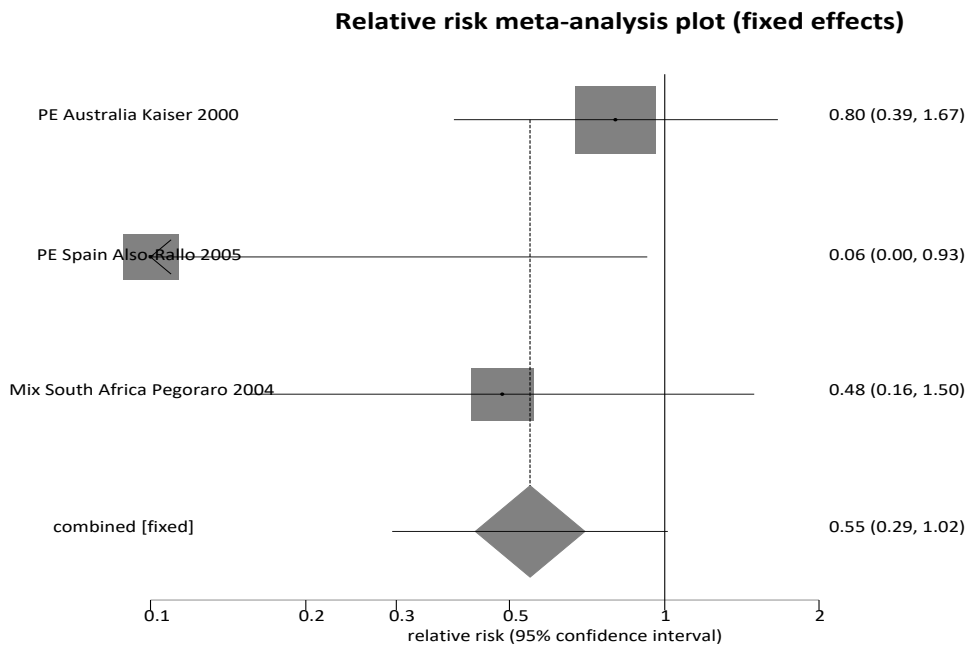

Figure S4b. Forest plot for *MTHFR A1298C* with types of hypertensive disorders in pregnancy for countries of CC risk < 1.

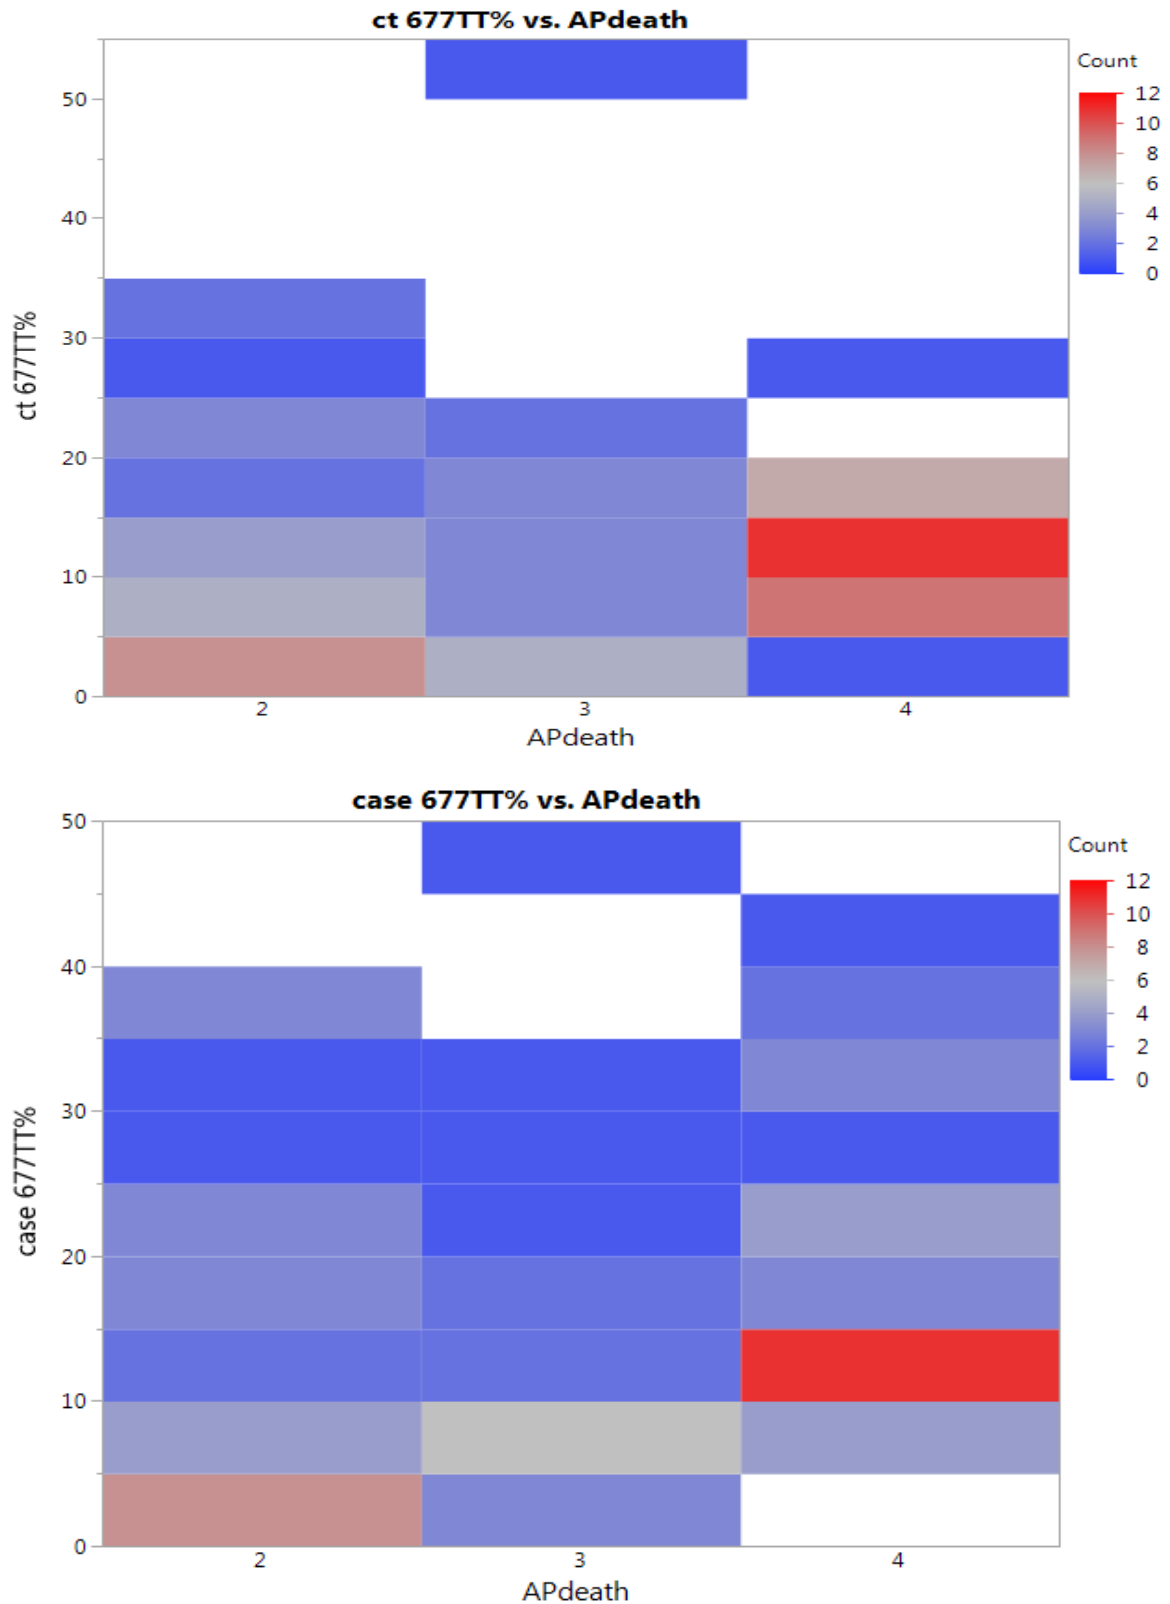

Figure S5a. Heat maps of *MTHFR* 677 homozygous *TT* genotypes for control and case groups in association with the rate of deaths from air pollution.

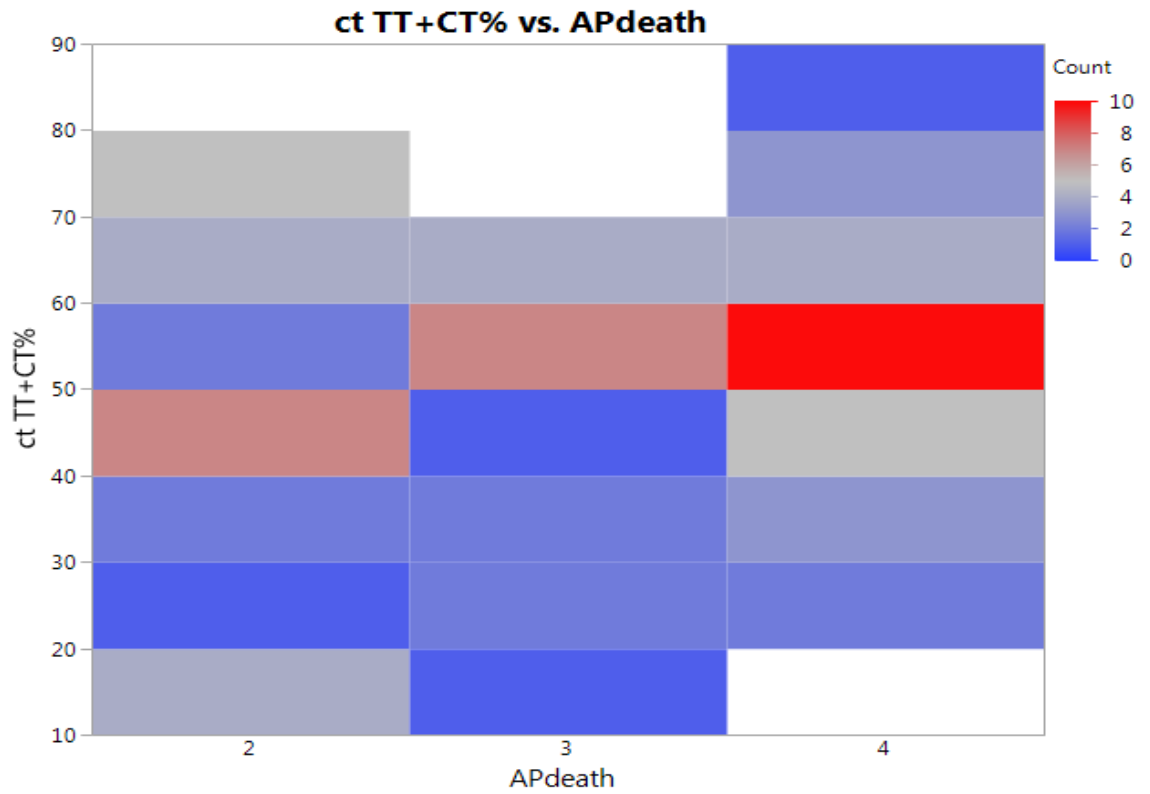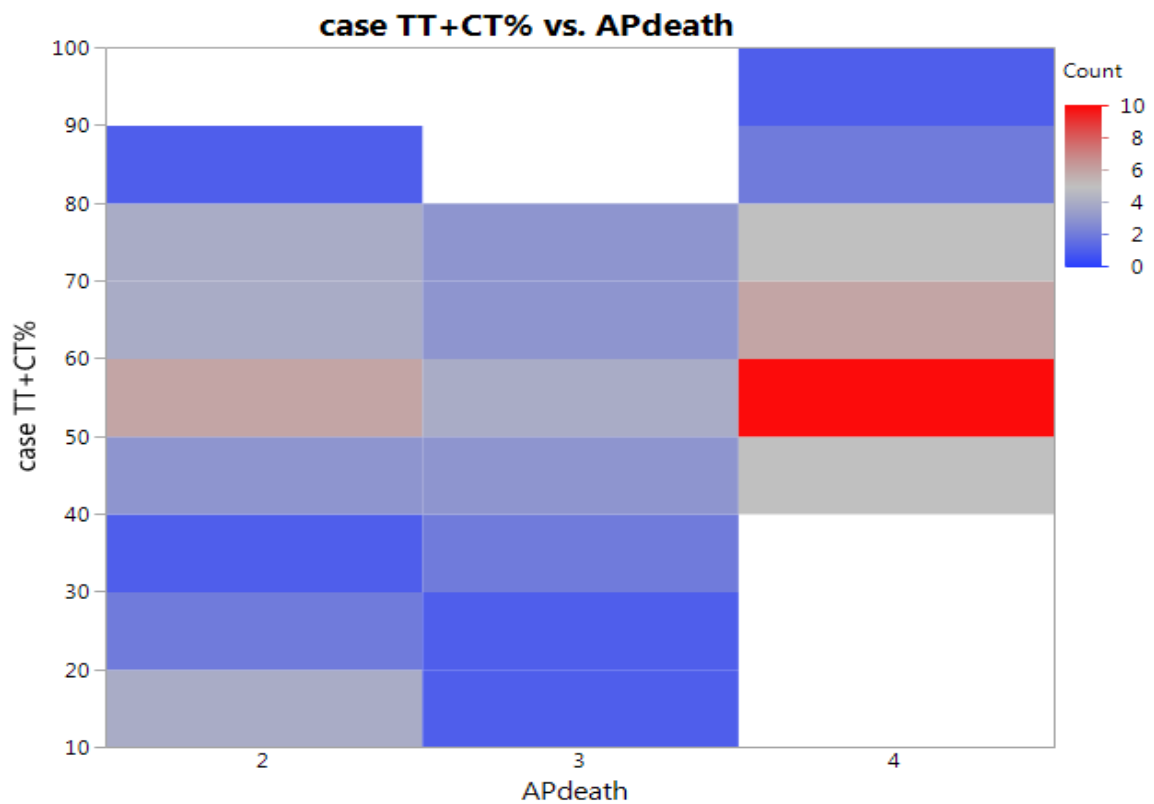

Figure S5b. Heat maps of *MTHFR* 677 *TT* plus *CT* genotypes for control and case groups in association with the rate of deaths from air pollution.
